# Supplementary material
Source: PubMed Central journal article supplement (PMC8760564)
Supplement: 11625_2021_1087_MOESM1_ESM.pdf [file 11625_2021_1087_MOESM1_ESM.pdf]

## Supplementary Material

The health, environmental and economic dimensions of dietary transitions in Argentina

Ezequiel M. Arrieta\*, Carlos González Fischer, Sebastian Aguiar, Milva Geri, Roberto J. Fernández, Julia Becaria Coquet, Carlos M. Scavuzzo, Andres Rieznik, Alberto León, Alejandro D. González & Esteban G. Jobbágy

\*Corresponding author: earrieta@imbiv.unc.edu.ar

### Content

Table S1: Diet composition of each scenario.

Table S2: Classification of the food items from the 2017/2018 National Survey of Household Income and Expenditure (NSHIE) for health dimension assessment.

Table S3: Nutrients per 100 grams per food group.

Table S4: Classification of the food items from the 2017/2018 National Survey of Household Income and Expenditure (NSHIE) for environmental dimension assessment.

Table S5: Coefficients of food losses and environmental footprint by food group (per kg of food).

Table S6: Monetary cost (in American dollars) per 100 grams per food group.

Table S7: Dietary quality assessment by using the 10-dimensional Alternate Healthy Eating Index.

Table S8: Food demand at the farm gate by dietary scenario.

Table S9: Environmental footprints of food production for each scenario.

Table S10: Daily expenditure in food for each dietary scenario.

**TABLE S1.** Classification of the food items from the 2017/2018 National Survey of Household Income and Expenditure (NSHIE) for health dimension assessment.

| <b>Food items (Spanish)</b>                                 | <b>Food items (English)</b>                      | <b>Classification</b> | <b>Unit</b> | <b>Average</b> | <b>Improved income</b> |
|-------------------------------------------------------------|--------------------------------------------------|-----------------------|-------------|----------------|------------------------|
| Aguja                                                       | Needle                                           | Beef                  | g/d         | 3.206          | 3.18                   |
| Asado                                                       | Roast                                            | Beef                  | g/d         | 14.642         | 25.65                  |
| Bife ancho                                                  | Wide steak                                       | Beef                  | g/d         | 4.351          | 7.163                  |
| Bife angosto                                                | Tenderloin steak                                 | Beef                  | g/d         | 8.603          | 9.933                  |
| Bife de chorizo                                             | Sausage steak                                    | Beef                  | g/d         | 0.661          | 1.139                  |
| bola de lomo                                                | Tenderloin steak                                 | Beef                  | g/d         | 7.011          | 8.413                  |
| Carnaza común                                               | Ground beef                                      | Beef                  | g/d         | 2.992          | 2.188                  |
| Carne picada                                                | Minced meat                                      | Beef                  | g/d         | 23.172         | 25.16                  |
| Cuadrada                                                    | Square                                           | Beef                  | g/d         | 2.77           | 3.172                  |
| Cuadril                                                     | Rump                                             | Beef                  | g/d         | 4.187          | 7.406                  |
| Falda                                                       | Skirt                                            | Beef                  | g/d         | 1.555          | 2.065                  |
| Hueso con carne                                             | Bone with meat                                   | Beef                  | g/d         | 7.864          | 6.976                  |
| Hueso sin carne                                             | Bone without meat                                | Beef                  | g/d         | 1.244          | 1.886                  |
| Lomo                                                        | Loin                                             | Beef                  | g/d         | 1.285          | 2.003                  |
| Matambre - cima                                             | Sausage - top                                    | Beef                  | g/d         | 1.132          | 1.759                  |
| Nalga                                                       | Buttock                                          | Beef                  | g/d         | 9.748          | 14.728                 |
| Paleta                                                      | Shoulder                                         | Beef                  | g/d         | 3.942          | 6.273                  |
| Palomita                                                    | Dove                                             | Beef                  | g/d         | 0.288          | 0.747                  |
| Peceto                                                      | Beefsteak                                        | Beef                  | g/d         | 1.375          | 2.623                  |
| Roast beef                                                  | Roast beef                                       | Beef                  | g/d         | 1.71           | 1.844                  |
| Vacío                                                       | Beef                                             | Beef                  | g/d         | 3.352          | 4.181                  |
| Otros cortes                                                | Other cuts                                       | Beef                  | g/d         | 3.437          | 4.474                  |
| Hígado                                                      | Liver                                            | Beef                  | g/d         | 1.531          | 1.516                  |
| Lengua de vaca                                              | Beef tongue                                      | Beef                  | g/d         | 0.188          | 0.36                   |
| Mondongo                                                    | Tripe                                            | Beef                  | g/d         | 0.488          | 0.428                  |
| Riñón                                                       | Kidney                                           | Beef                  | g/d         | 0.134          | 0.174                  |
| Otras achuras y menudencias vacunas                         | Other beef offal and giblets                     | Beef                  | g/d         | 0.649          | 0.527                  |
| Hamburguesas para cocinar (semipreparados)                  | Hamburgers for cooking (semi-prepared)           | Beef                  | g/d         | 3.322          | 5.199                  |
| Milanesas para cocinar (semipreparados)                     | Breaded meat for cooking (semi-prepared)         | Beef                  | g/d         | 8.401          | 19.273                 |
| Otros alimentos semipreparados en base a carne para cocinar | Other semi-prepared meat-based foods for cooking | Beef                  | g/d         | 0.202          | 0.286                  |
| Surtidos de carne fresca vacuna                             | Assortments of fresh beef                        | Beef                  | g/d         | 3.586          | 4.782                  |
| Pollo entero, medio pollo                                   | Whole chicken, half chicken                      | Chicken               | g/d         | 35.643         | 43.55                  |
| Pollo trozado                                               | Chicken cut in pieces                            | Chicken               | g/d         | 30.798         | 33.043                 |
| Otras aves                                                  | Other poultry                                    | Chicken               | g/d         | 0.154          | 1.204                  |
| Menudencias de ave                                          | Poultry offal                                    | Chicken               | g/d         | 3.854          | 2.505                  |
| Supremas de pollo rebozadas                                 | Battered chicken supremes                        | Chicken               | g/d         | 18.002         | 19.28                  |
| Surtidos de carne de ave                                    | Assorted poultry meat                            | Chicken               | g/d         | 0.127          | 0.234                  |
| Lechón entero o medio                                       | Whole or half suckling pig                       | Pork                  | g/d         | 0.718          | 0.162                  |
| Costeleta - chuleta de cerdo                                | Pork cutlet - pork chop                          | Pork                  | g/d         | 2.974          | 5.012                  |

|                                                                      |                                                                    |                  |     |       |       |
|----------------------------------------------------------------------|--------------------------------------------------------------------|------------------|-----|-------|-------|
| Paleta de cerdo                                                      | Pork shoulder                                                      | Pork             | g/d | 0.412 | 0.401 |
| Lomo cerdo                                                           | Pork loin                                                          | Pork             | g/d | 0.182 | 0.331 |
| Carré de cerdo                                                       | Pork rump                                                          | Pork             | g/d | 0.641 | 1.646 |
| Pechito de cerdo                                                     | Pork brisket                                                       | Pork             | g/d | 0.684 | 0.979 |
| Otros cortes de carne porcina                                        | Other pork cuts                                                    | Pork             | g/d | 1.615 | 3.278 |
| Achuras y menudencias, porcinas y ovinas                             | Offal and giblets, pork and sheep meat                             | Pork             | g/d | 0.14  | 0.066 |
| Otros alimentos semipreparados en base a carne porcina u ovina       | Other semi-prepared foods based on pork or sheep meat              | Pork             | g/d | 0.169 | 0.329 |
| Ovino y caprino, entero o por corte                                  | Sheep and goat, whole or by cuts                                   | Lamb and mutton  | g/d | 1.468 | 2.275 |
| Surtidos de carne porcina u ovina                                    | Assorted pork and mutton products                                  | Lamb and mutton  | g/d | 0.135 | 0.323 |
| Atún - lomo de atún-salmón- congrio                                  | Tuna - tuna loin - salmon - conger eel                             | Fish and seafood | g/d | 0.158 | 0.204 |
| Brótola- lenguado                                                    | Forkbeard - sole                                                   | Fish and seafood | g/d | 0.045 | 0.115 |
| Merluza                                                              | Hake                                                               | Fish and seafood | g/d | 2.247 | 4.653 |
| Pejerrey                                                             | Silverside                                                         | Fish and seafood | g/d | 0.059 | 0.108 |
| Surubí                                                               | Surubí                                                             | Fish and seafood | g/d | 0.079 | 0.032 |
| Otros pescados de mar                                                | Other sea fish                                                     | Fish and seafood | g/d | 1.008 | 0.51  |
| Otros pescados de río                                                | Other river fish                                                   | Fish and seafood | g/d | 0.822 | 0.823 |
| Almejas, berberechos, mejillones, cholgas, vieiras                   | Clams, cockles, mussels, mussels, scallops, scallops               | Fish and seafood | g/d | 0.062 | 0.111 |
| Calamares                                                            | Squid                                                              | Fish and seafood | g/d | 0.063 | 0.079 |
| Langostinos y camarones                                              | Shrimps and prawns                                                 | Fish and seafood | g/d | 0.044 | 0.038 |
| Otros mariscos                                                       | Other seafood                                                      | Fish and seafood | g/d | 0.015 | 0.014 |
| Filet preparado para cocinar                                         | Ready-to-cook fillets                                              | Fish and seafood | g/d | 0.219 | 0.245 |
| Semipreparados congelados en base a pescado y mariscos               | Frozen semi-prepared fish and seafood-based products               | Fish and seafood | g/d | 0.479 | 1.395 |
| Surtidos de pescados y mariscos frescos, congelados y semipreparados | Assortments of fresh, frozen and semi-prepared fish, and shellfish | Fish and seafood | g/d | 0.122 | 0.575 |
| Atún en conserva                                                     | Canned tuna                                                        | Fish and seafood | g/d | 1.211 | 1.938 |
| Caballa en conserva                                                  | Canned mackerel                                                    | Fish and seafood | g/d | 0.258 | 0.429 |
| Filet de anchoas                                                     | Anchovy fillets                                                    | Fish and seafood | g/d | 0.147 | 0.026 |
| Mariscos en conserva                                                 | Canned seafood                                                     | Fish and seafood | g/d | 0.006 | 0.007 |
| Sardinas en conserva                                                 | Canned sardines                                                    | Fish and seafood | g/d | 0.04  | 0.089 |
| Otras conservas de                                                   | Other canned                                                       | Fish and         | g/d | 0.032 | 0.067 |

| pescado                                                     | fish                                               | seafood          |      |        |        |
|-------------------------------------------------------------|----------------------------------------------------|------------------|------|--------|--------|
| Surtidos de pescados y mariscos en conserva                 | Assortments of canned fish and shellfish           | Fish and seafood | g/d  | 0.027  | 0.011  |
| Otras carnes frescas o congeladas                           | Other fresh or frozen meats                        | Other meats      | g/d  | 0.27   | 0.97   |
| Hamburguesas de pollo                                       | Chicken hamburgers                                 | Processed meat   | g/d  | 0.735  | 1.214  |
| Preparados de pollo: Formitas, patitas, etc.                | Chicken preparations: formites, paws, etc.         | Processed meat   | g/d  | 0.637  | 1.209  |
| Otros alimentos semipreparados en base a pollo para cocinar | Other semi-prepared chicken-based food for cooking | Processed meat   | g/d  | 0.306  | 0.601  |
| Chorizo fresco                                              | Fresh chorizo sausage                              | Processed meat   | g/d  | 7.68   | 31.625 |
| Morcilla                                                    | Blood sausage                                      | Processed meat   | g/d  | 1.747  | 12.158 |
| Salchicha criolla                                           | Creole sausage                                     | Processed meat   | g/d  | 0.266  | 0.404  |
| Salchicha tipo viena con y sin piel                         | Vienna-type sausage with and without skin          | Processed meat   | g/d  | 2.888  | 3.774  |
| Otros embutidos frescos                                     | Other fresh sausages                               | Processed meat   | g/d  | 0.061  | 0.078  |
| Surtidos de embutidos frescos                               | Assortments of fresh sausages                      | Processed meat   | g/d  | 0.035  | 0.014  |
| Bondiola                                                    | Bondiola                                           | Processed meat   | g/d  | 0.057  | 0.171  |
| Jamón cocido                                                | Cooked ham                                         | Processed meat   | g/d  | 2.029  | 3.037  |
| Jamón crudo                                                 | Raw ham                                            | Processed meat   | g/d  | 0.152  | 0.224  |
| Lomito                                                      | Tenderloin                                         | Processed meat   | g/d  | 0.049  | 0.145  |
| Matambre (fiambre)                                          | Matambre (cold meat)                               | Processed meat   | g/d  | 0.038  | 0.047  |
| Mortadela                                                   | Mortadella                                         | Processed meat   | g/d  | 0.609  | 0.891  |
| Paleta (fiambre)                                            | Shoulder (cold meat)                               | Processed meat   | g/d  | 1.2    | 1.637  |
| Panceta fresca, salada, ahumada                             | Fresh, salted, smoked bacon                        | Processed meat   | g/d  | 0.085  | 0.184  |
| Salame                                                      | Salami                                             | Processed meat   | g/d  | 0.568  | 0.877  |
| Salamín                                                     | Salami                                             | Processed meat   | g/d  | 0.238  | 0.448  |
| Salchichón                                                  | Salami                                             | Processed meat   | g/d  | 0.071  | 0.046  |
| Otros fiambres                                              | Other cold cuts                                    | Processed meat   | g/d  | 0.188  | 0.326  |
| Surtidos de fiambres                                        | Assortments of cold cuts                           | Processed meat   | g/d  | 0.896  | 1.33   |
| Carnes en conserva, escabeches                              | Canned meats, pickled meats                        | Processed meat   | g/d  | 0.008  | 0.005  |
| Paté de foie - ave en lata                                  | Canned poultry and foie gras pâté                  | Processed meat   | g/d  | 0.122  | 0.28   |
| Picadillo de carne en lata                                  | Canned minced meat in cans                         | Processed meat   | g/d  | 1.082  | 0.366  |
| Otras pastas de carne                                       | Other meat pastes                                  | Processed meat   | g/d  | 0.038  | 0.034  |
| Surtidos de procesados en base a carne                      | Assortments of processed meat products             | Processed meat   | g/d  | 0.003  | 0      |
| Leche común entera                                          | Regular whole milk                                 | Milk             | ml/d | 45.483 | 66.422 |
| Leche común descremada                                      | Regular skim milk                                  | Milk             | ml/d | 10.886 | 20.269 |
| Leche larga vida entera                                     | Whole long-life milk                               | Milk             | ml/d | 12.597 | 20.952 |
| Leche larga vida descremada                                 | Long-life skim milk                                | Milk             | ml/d | 4.209  | 5.49   |

|                                               |                                                |                |      |        |        |
|-----------------------------------------------|------------------------------------------------|----------------|------|--------|--------|
| Leche en polvo entera o descremada            | Powdered whole or skimmed milk powder          | Milk           | g/d  | 6.875  | 3.238  |
| Leches condensadas, evaporadas                | Condensed and evaporated milk                  | Milk           | ml/d | 0.051  | 0.043  |
| Leches preparadas con aditamentos             | Prepared milk with additives                   | Milk           | ml/d | 1.486  | 2.207  |
| Otras leches fluidas                          | Other fluid milk                               | Milk           | ml/d | 0.006  | 0      |
| leche en polvo fortificada para lactantes     | Fortified powdered milk for infants            | Milk           | g/d  | 0.092  | 0.296  |
| leche en fluida fortificada para lactantes    | fortified fluid milk for infants               | Milk           | g/d  | 0.008  | 0.004  |
| Queso crema para untar                        | Cream cheese spreads                           | Dairy products | g/d  | 3.705  | 4.392  |
| Queso de máquina                              | Machine cheese                                 | Dairy products | g/d  | 4.106  | 4.688  |
| Queso doble crema - cuartirolo                | Heavy cream cheese - cuartirolo                | Dairy products | g/d  | 11.587 | 16.655 |
| Queso fontina - gouda - chubut - edan - fymbo | fontina - gouda - chubut - edan - fymbo cheese | Dairy products | g/d  | 0.184  | 0.275  |
| Queso fundido                                 | Processed cheese                               | Dairy products | g/d  | 0.015  | 0.014  |
| Queso paté-gras - mar del plata               | Pate-gras cheese - mar del plata               | Dairy products | g/d  | 0.304  | 0.447  |
| Queso port salut                              | Port salut cheese                              | Dairy products | g/d  | 0.7    | 1.185  |
| Queso para rallar                             | Cheese for grating                             | Dairy products | g/d  | 0.922  | 1.624  |
| Queso rallado                                 | Grated cheese                                  | Dairy products | g/d  | 0.951  | 1.526  |
| Muzzarella                                    | Mozzarella                                     | Dairy products | g/d  | 0.749  | 1.434  |
| Ricota                                        | Ricotta                                        | Dairy products | g/d  | 0.178  | 0.368  |
| Otros quesos                                  | Other cheeses                                  | Dairy products | g/d  | 0.291  | 0.418  |
| Surtidos de quesos                            | Assorted cheeses                               | Dairy products | g/d  | 0.095  | 0.234  |
| Crema de leche                                | Milk cream                                     | Dairy products | g/d  | 2.499  | 2.513  |
| Manteca                                       | Butter                                         | Dairy products | g/d  | 1.482  | 2.402  |
| Yogur natural o saborizado                    | Natural or flavored yogurt                     | Dairy products | ml/d | 21.75  | 29.963 |
| Yogur con aditamentos                         | Yogurt with additives                          | Dairy products | ml/d | 0.621  | 1.162  |
| Dulce de leche                                | Dulce de leche                                 | Dairy products | g/d  | 2.482  | 4.039  |
| Postres lácteos                               | Dairy desserts                                 | Dairy products | g/d  | 1.129  | 2.144  |
| Otros productos lácteos                       | Other dairy products                           | Dairy products | g/d  | 0.012  | 0.009  |
| Surtidos de productos lácteos                 | Assortments of dairy products                  | Dairy products | ml/d | 0.048  | 0.09   |
| Leche de soja                                 | Soy milk                                       | Vegetal milk   | ml/d | 0.066  | 0.072  |
| Leches vegetales                              | Vegetable milk                                 | Vegetal milk   | ml/d | 0.032  | 0      |
| Huevos de gallina                             | Chicken eggs                                   | Eggs           | g/d  | 16.883 | 21.645 |
| Otros huevos                                  | Other eggs                                     | Eggs           | g/d  | 0.036  | 0.092  |
| Facturas y churros                            | Bills and churros                              | Refined grains | g/d  | 2.571  | 4.582  |
| Galletas, grisines y tostadas                 | Cookies, breadsticks, and toast                | Refined grains | g/d  | 1.564  | 2.958  |
| Galletitas de agua envasadas                  | Packaged water crackers                        | Refined grains | g/d  | 5.477  | 9.368  |
| Galletitas de agua sueltas                    | Loose water crackers                           | Refined grains | g/d  | 0.285  | 0.419  |
| Galletitas dulces envasadas                   | Packaged sweet cookies                         | Refined grains | g/d  | 9.923  | 16.514 |
| Galletitas dulces sueltas                     | Loose sweet cookies                            | Refined grains | g/d  | 0.228  | 0.496  |

|                                                  |                                                 |                |     |        |        |
|--------------------------------------------------|-------------------------------------------------|----------------|-----|--------|--------|
| Galletitas de otro tipo                          | Other types of cookies                          | Refined grains | g/d | 1.719  | 3.243  |
| Masas secas o finas                              | Dry or thin doughs                              | Refined grains | g/d | 0.157  | 0.36   |
| Pan envasado en rebanadas blanco                 | Packaged white sliced bread                     | Refined grains | g/d | 1.674  | 2.967  |
| Pan tipo francés fresco en piezas                | Fresh French-type bread in pieces               | Refined grains | g/d | 95.081 | 82.713 |
| Pan para hamburguesas - pebetes - panchos        | Bread for hamburgers - pebetes - hot dogs       | Refined grains | g/d | 1.277  | 2.273  |
| Pan rallado                                      | Breadcrumbs                                     | Refined grains | g/d | 3.043  | 3.778  |
| Pancitos, bollitos, figazzitas saborizados       | Bread rolls, buns, flavored figazzitas          | Refined grains | g/d | 0.219  | 0.245  |
| Panes y panecillos frescos de otro tipo          | Other fresh bread and rolls                     | Refined grains | g/d | 6.975  | 8.18   |
| Panes y panecillos precocidos y congelados       | Pre-baked and frozen bread and rolls            | Refined grains | g/d | 0.109  | 0.184  |
| Pan blanco de molde por pieza                    | White sliced bread by piece                     | Refined grains | g/d | 0.632  | 0.721  |
| Tortas, tartas, pan dulce                        | Cakes, pies, sweet bread                        | Refined grains | g/d | 1.65   | 3.346  |
| Otros productos de panadería y repostería        | Other bakery and confectionery products         | Refined grains | g/d | 1.428  | 1.07   |
| Surtidos de productos de panadería y pastelería  | Assortments of bakery and pastry products       | Refined grains | g/d | 1.926  | 1.414  |
| Arroz blanco                                     | White rice                                      | Refined grains | g/d | 25.037 | 26.741 |
| Otros arroces con aditamentos                    | Other rice with additions                       | Refined grains | g/d | 0.026  | 0.025  |
| Fideos de arroz                                  | Rice noodles                                    | Refined grains | g/d | 0.019  | 0.014  |
| Féculas                                          | Starch                                          | Refined grains | g/d | 0.327  | 0.563  |
| Harina de maíz                                   | Corn flour                                      | Refined grains | g/d | 3.077  | 3.154  |
| Harina de trigo                                  | Wheat flour                                     | Refined grains | g/d | 24.697 | 24.373 |
| Mezcla de harina para pizza, ñoquis, torta frita | Flour mix for pizza, gnocchi, and torta frita   | Refined grains | g/d | 0.897  | 1.362  |
| Mezcla de cereales y fibras o frutas             | Cereal and fiber or fruit mix                   | Refined grains | g/d | 0.067  | 0.161  |
| Otras harinas, cereales y fibras                 | Other flours, cereals, and fibers               | Refined grains | g/d | 0.062  | 0.115  |
| surtidos de harinas, arroz, cereales y fibras    | Assortments of flours, rice, cereals and fibers | Refined grains | g/d | 0.096  | 0      |
| Canelones                                        | Cannelloni                                      | Refined grains | g/d | 0.047  | 0.069  |
| Empanadas preparadas sin cocinar                 | Prepared uncooked pies                          | Refined grains | g/d | 0.059  | 0.119  |
| Fideos frescos                                   | Fresh noodles                                   | Refined grains | g/d | 1.334  | 2.186  |
| Fideos secos                                     | Dried noodles                                   | Refined grains | g/d | 25.504 | 29.174 |
| Ñoquis frescos                                   | Fresh gnocchi                                   | Refined grains | g/d | 0.551  | 1.209  |
| Pastas deshidratadas con y sin relleno           | Dehydrated pasta with and without filling       | Refined grains | g/d | 0.311  | 0.476  |
| Pizzas preparadas sin cocinar                    | Prepared uncooked pizzas                        | Refined grains | g/d | 0.284  | 0.359  |
| Pre-pizza                                        | Pre-pizza                                       | Refined grains | g/d | 3.72   | 4.977  |
| Ravioles frescos                                 | Fresh ravioli                                   | Refined grains | g/d | 3.445  | 5.59   |

|                                                                                                                     |                                                                                                            |                    |     |       |       |
|---------------------------------------------------------------------------------------------------------------------|------------------------------------------------------------------------------------------------------------|--------------------|-----|-------|-------|
| Tapas frescas para canelones, panqueques, lasagnas, etc.                                                            | Fresh toppings for cannelloni, pancakes, lasagna, etc.                                                     | Refined grains     | g/d | 0.026 | 0.075 |
| Tapas frescas para empanadas y pastelitos                                                                           | Fresh covers for empanadas and pastries                                                                    | Refined grains     | g/d | 2.979 | 4.603 |
| Tapas frescas para tartas                                                                                           | Fresh covers for pies                                                                                      | Refined grains     | g/d | 2.127 | 3.375 |
| Rapiditas, fajitas, etc.                                                                                            | Rapiditas, fajitas, etc.                                                                                   | Refined grains     | g/d | 0.096 | 0.154 |
| Otras pastas frescas rellenas, tortelletis, fideos rellenos, panzotitis, agnolottis, capellettis, sorrentinos, etc. | Other fresh stuffed pasta, tortelletis, stuffed noodles, panzotitis, agnolottis, capellettis, sorrentinos. | Refined grains     | g/d | 0.575 | 1.48  |
| Otros alimentos semipreparados en base a pastas                                                                     | Other semi-prepared pasta-based foods                                                                      | Refined grains     | g/d | 0.019 | 0.062 |
| Surtidos de pastas                                                                                                  | Assortments of pasta                                                                                       | Refined grains     | g/d | 0.031 | 0.036 |
| Pan envasado en rebanadas integral                                                                                  | Whole wheat sliced packaged bread                                                                          | Whole grains       | g/d | 3.403 | 2.037 |
| Pan integral fresco en piezas                                                                                       | Fresh whole wheat bread in pieces                                                                          | Whole grains       | g/d | 1.121 | 1.553 |
| Arroz integral                                                                                                      | Brown rice                                                                                                 | Whole grains       | g/d | 0.348 | 0.521 |
| Avena                                                                                                               | Oatmeal                                                                                                    | Whole grains       | g/d | 0.388 | 0.684 |
| Sémola y semolín                                                                                                    | Semolina and semolina                                                                                      | Whole grains       | g/d | 0.429 | 0.584 |
| Cereales en grano                                                                                                   | Grain cereals                                                                                              | Whole grains       | g/d | 1.025 | 0.983 |
| Cereales inflados                                                                                                   | Puffed cereals                                                                                             | Whole grains       | g/d | 1.053 | 1.85  |
| Harinas integrales                                                                                                  | Whole grain flours                                                                                         | Whole grains       | g/d | 0.279 | 0.469 |
| Choclo fresco                                                                                                       | Fresh corn                                                                                                 | Whole grains       | g/d | 2.122 | 2.099 |
| Choclo en conserva                                                                                                  | Canned corn                                                                                                | Whole grains       | g/d | 0.784 | 1.427 |
| Arvejas frescas                                                                                                     | Fresh peas                                                                                                 | Legumes and pulses | g/d | 0.272 | 0.243 |
| Chauchas frescas                                                                                                    | Fresh string beans                                                                                         | Legumes and pulses | g/d | 0.384 | 0.544 |
| Otras legumbres frescas                                                                                             | Other fresh legumes                                                                                        | Legumes and pulses | g/d | 0.028 | 0.027 |
| Legumbres congeladas                                                                                                | Frozen vegetables                                                                                          | Legumes and pulses | g/d | 0.072 | 0.125 |
| Milanesa de soja                                                                                                    | Soybean Milanese                                                                                           | Legumes and pulses | g/d | 1.334 | 0.639 |
| Arvejas secas                                                                                                       | Dried peas                                                                                                 | Legumes and pulses | g/d | 0.107 | 0.103 |
| Lentejas secas                                                                                                      | Dried lentils                                                                                              | Legumes and pulses | g/d | 0.842 | 1.792 |
| Porotos secos                                                                                                       | Dried beans                                                                                                | Legumes and pulses | g/d | 0.387 | 0.552 |
| Otras legumbres secas                                                                                               | Other dried pulses                                                                                         | Legumes and pulses | g/d | 0.069 | 0.063 |
| Arvejas en conserva                                                                                                 | Canned peas                                                                                                | Legumes and pulses | g/d | 1.624 | 2.311 |
| Lentejas en conserva                                                                                                | Canned lentils                                                                                             | Legumes and pulses | g/d | 0.194 | 0.321 |
| Porotos en conserva                                                                                                 | Canned beans                                                                                               | Legumes and pulses | g/d | 0.055 | 0.154 |
| Otras legumbres en                                                                                                  | Other canned                                                                                               | Legumes and        | g/d | 0.049 | 0.083 |

|                                                    |                                                  |                |     |        |        |
|----------------------------------------------------|--------------------------------------------------|----------------|-----|--------|--------|
| conserva                                           | pulses                                           | pulses         |     |        |        |
| Semillas                                           | Seeds                                            | Nuts and seeds | g/d | 0.125  | 0.243  |
| Frutas secas                                       | Dried fruits                                     | Nuts and seeds | g/d | 0.382  | 0.452  |
| Ciruelas disecadas                                 | Dried plums                                      | Nuts and seeds | g/d | 0.037  | 0.194  |
| Pasas de uva                                       | Raisins                                          | Nuts and seeds | g/d | 0.089  | 0.11   |
| Ananá                                              | Pineapple                                        | Fruits         | g/d | 0.51   | 0.749  |
| Banana                                             | Banana                                           | Fruits         | g/d | 21.181 | 30.785 |
| Cerezas, guindas frescas                           | Cherries, fresh cherries                         | Fruits         | g/d | 0.338  | 0.681  |
| Ciruella                                           | Plum                                             | Fruits         | g/d | 1.026  | 1.719  |
| Damasco                                            | Apricot                                          | Fruits         | g/d | 0.197  | 0.122  |
| Durazno                                            | Peach                                            | Fruits         | g/d | 2.656  | 5.515  |
| Frutillas frescas                                  | Fresh strawberries                               | Fruits         | g/d | 1.059  | 1.616  |
| Kiwi fresco                                        | Fresh kiwi                                       | Fruits         | g/d | 0.372  | 0.703  |
| Limón                                              | Lemon                                            | Fruits         | g/d | 4.006  | 5.483  |
| Mandarina                                          | Tangerine                                        | Fruits         | g/d | 7.536  | 11.093 |
| Manzana                                            | Apple                                            | Fruits         | g/d | 13.429 | 20.789 |
| Melón fresco                                       | Fresh melon                                      | Fruits         | g/d | 1.239  | 1.574  |
| Naranja                                            | Orange                                           | Fruits         | g/d | 15.743 | 22.105 |
| Palta fresca                                       | Fresh avocado                                    | Fruits         | g/d | 0.882  | 1.564  |
| Pelón fresco                                       | Fresh peel                                       | Fruits         | g/d | 0.314  | 0.658  |
| Pera                                               | Pear                                             | Fruits         | g/d | 3.2    | 5.267  |
| Pomelo fresco                                      | Fresh grapefruit                                 | Fruits         | g/d | 0.902  | 1.474  |
| Sandía fresca                                      | Fresh watermelon                                 | Fruits         | g/d | 3.758  | 6.223  |
| Uva fresca                                         | Fresh grapes                                     | Fruits         | g/d | 1.679  | 2.517  |
| Otras frutas frescas                               | Other fresh fruits                               | Fruits         | g/d | 0.167  | 0.349  |
| Frutas congeladas                                  | Frozen fruits                                    | Fruits         | g/d | 0.003  | 0      |
| Surtidos de frutas frescas o congeladas            | Assortments of fresh or frozen fruits            | Fruits         | g/d | 4.429  | 6.684  |
| Ananá en almíbar o en conserva                     | Pineapple in syrup or preserved                  | Fruits         | g/d | 0.126  | 0.149  |
| Duraznos en almíbar o en conserva                  | Peaches in syrup or canned peaches               | Fruits         | g/d | 1.973  | 3.865  |
| Ensalada de frutas en almíbar o en conserva        | Fruit salad in syrup or preserves                | Fruits         | g/d | 0.198  | 0.31   |
| Otras frutas en conserva                           | Other canned fruits                              | Fruits         | g/d | 0.085  | 0.066  |
| Otras frutas disecadas                             | Other dried fruits                               | Fruits         | g/d | 0.031  | 0.228  |
| Surtidos de frutas procesadas, secas o en conserva | Assortments of processed, dried or canned fruits | Fruits         | g/d | 0.042  | 0.036  |
| Acelga                                             | Chard                                            | Vegetables     | g/d | 4.846  | 7.317  |
| Ají fresco                                         | Fresh chili                                      | Vegetables     | g/d | 4.683  | 5.441  |
| Ajo                                                | Garlic                                           | Vegetables     | g/d | 0.104  | 0.148  |
| Albahaca, perejil fresco                           | Basil, fresh parsley                             | Vegetables     | g/d | 0.075  | 0.084  |
| Alcauciles                                         | Artichokes                                       | Vegetables     | g/d | 0.045  | 0.041  |
| Apio, hinojo fresco                                | Celery, fresh fennel                             | Vegetables     | g/d | 0.578  | 0.771  |
| Berenjenas frescas                                 | Fresh eggplant                                   | Vegetables     | g/d | 1.38   | 1.954  |
| Cebolla común fresca                               | Fresh onion                                      | Vegetables     | g/d | 31.915 | 35.532 |
| Cebolla de verdeo, puerro fresco                   | Green onion, fresh leek                          | Vegetables     | g/d | 0.843  | 1.148  |
| Coliflor, brócoli                                  | Cauliflower,                                     | Vegetables     | g/d | 0.65   | 1.145  |



|                                                                               |                                                                              |                    |     |        |        |
|-------------------------------------------------------------------------------|------------------------------------------------------------------------------|--------------------|-----|--------|--------|
| fresco                                                                        | fresh broccoli                                                               |                    |     |        |        |
| Espinaca fresca                                                               | Fresh spinach                                                                | Vegetables         | g/d | 0.935  | 1.555  |
| Hongos                                                                        | Mushrooms                                                                    | Vegetables         | g/d | 0.067  | 0.064  |
| Lechuga fresca                                                                | Fresh lettuce                                                                | Vegetables         | g/d | 8.432  | 11.523 |
| Pepino fresco                                                                 | Fresh cucumber                                                               | Vegetables         | g/d | 0.536  | 0.717  |
| Rabanitos                                                                     | Radishes                                                                     | Vegetables         | g/d | 0.06   | 0.192  |
| Radicheta, radicha, rúcula fresca                                             | Fresh radicchio, radicha, fresh arugula                                      | Vegetables         | g/d | 0.395  | 0.791  |
| Remolacha fresca                                                              | Fresh beet                                                                   | Vegetables         | g/d | 1.06   | 1.599  |
| Repollo fresco                                                                | Fresh cabbage                                                                | Vegetables         | g/d | 1.265  | 1.568  |
| Tomate perita fresco                                                          | Fresh pear tomato                                                            | Vegetables         | g/d | 18.544 | 21.092 |
| Tomate redondo fresco                                                         | Fresh round tomato                                                           | Vegetables         | g/d | 18.423 | 25.533 |
| Tomate Cherry                                                                 | Cherry tomato                                                                | Vegetables         | g/d | 0.414  | 0.7    |
| Verdurita, jardinera, ensaladas varias frescas                                | Baby greens, garden vegetables, various fresh salads                         | Vegetables         | g/d | 0.042  | 0.088  |
| Zanahoria fresca                                                              | Fresh carrot                                                                 | Vegetables         | g/d | 14.141 | 18.277 |
| Zapallitos frescos                                                            | Fresh zucchini                                                               | Vegetables         | g/d | 5.201  | 8.021  |
| Zapallo fresco                                                                | Fresh pumpkin                                                                | Vegetables         | g/d | 14.014 | 17.662 |
| Otras verduras y tubérculos frescos                                           | Other fresh vegetables and tubers                                            | Vegetables         | g/d | 0.176  | 0.564  |
| Aceitunas                                                                     | Olives                                                                       | Vegetables         | g/d | 0.502  | 0.969  |
| Verduras congeladas                                                           | Frozen vegetables                                                            | Vegetables         | g/d | 0.256  | 0.399  |
| Semipreparados frescos o congeladas en base a verduras para cocinar           | Semi-prepared fresh or frozen vegetable-based products for cooking           | Vegetables         | g/d | 0.112  | 0.065  |
| Surtidos de verduras, tubérculos y legumbres frescas o congeladas             | Assortments of fresh or frozen vegetables, root vegetables and legumes       | Vegetables         | g/d | 12.272 | 22.159 |
| Tomates en conserva                                                           | Canned tomatoes                                                              | Vegetables         | g/d | 18.01  | 15.992 |
| Verduras en conserva                                                          | Canned vegetables                                                            | Vegetables         | g/d | 0.364  | 0.596  |
| Polvo para puré zapallo deshidratado                                          | Dehydrated pumpkin purée powder                                              | Vegetables         | g/d | 0.002  | 0      |
| Otras verduras deshidratadas                                                  | Other dehydrated vegetables                                                  | Vegetables         | g/d | 0.01   | 0.002  |
| Surtidos de verduras, tubérculos y legumbres secas o en conservas y derivadas | Assortments of dried or canned vegetables, tubers and pulses and by-products | Vegetables         | g/d | 0.241  | 0.492  |
| Batata fresca                                                                 | Fresh sweet potato                                                           | Starchy vegetables | g/d | 2.557  | 3.702  |
| Mandioca fresca                                                               | Fresh cassava                                                                | Starchy vegetables | g/d | 1.265  | 0.827  |
| Papa fresca                                                                   | Fresh potatoes                                                               | Starchy vegetables | g/d | 91.075 | 96.645 |
| Papas y otros tubérculos congelados                                           | Potatoes and other frozen tubers                                             | Starchy vegetables | g/d | 0.47   | 1.038  |
| Polvo para puré de papa o batata                                              | Dehydrated mashed potato or                                                  | Starchy vegetables | g/d | 0.324  | 0.561  |

|                                       |                                        |                          |      |        |        |
|---------------------------------------|----------------------------------------|--------------------------|------|--------|--------|
| deshidratado                          | sweet potato powder                    |                          |      |        |        |
| Aceite mezcla                         | Blended oil                            | Vegetable oil and fats   | ml/d | 3.873  | 4.624  |
| Aceite de girasol                     | Sunflower oil                          | Vegetable oil and fats   | ml/d | 19.562 | 27.258 |
| Aceite de maíz                        | Corn oil                               | Vegetable oil and fats   | ml/d | 0.459  | 0.705  |
| Aceite de oliva                       | Olive oil                              | Vegetable oil and fats   | ml/d | 0.553  | 0.934  |
| Aceite de soja                        | Soybean oil                            | Vegetable oil and fats   | ml/d | 0.063  | 0.28   |
| Otros aceites                         | Other oils                             | Vegetable oil and fats   | ml/d | 0.022  | 0.004  |
| Surtidos de aceites                   | Assortments of oils                    | Vegetable oil and fats   | ml/d | 0.015  | 0      |
| Margarina                             | Margarine                              | Vegetable oil and fats   | g/d  | 0.239  | 0.51   |
| Grasa porcina                         | Pork fat                               | Oils and fats (animal)   | g/d  | 0.101  | 0.261  |
| Grasa vacuna                          | Bovine fat                             | Oils and fats (animal)   | g/d  | 0.918  | 0.593  |
| Otras grasas                          | Other fats                             | Oils and fats (animal)   | g/d  | 0.011  | 0.036  |
| Surtidos de grasa para la cocina      | Assortments of cooking fats            | Oils and fats (animal)   | g/d  | 0.004  | 0.011  |
| Azúcar                                | Sugar                                  | Sweet, candies and sugar | g/d  | 25.828 | 34.08  |
| Edulcorante                           | Sweetener                              | Sweet, candies and sugar | ml/d | 0.703  | 1.473  |
| Dulce de batata                       | Sweet potato paste                     | Sweet, candies and sugar | g/d  | 0.716  | 1.308  |
| Dulce de membrillo                    | Quince jelly                           | Sweet, candies and sugar | g/d  | 0.532  | 0.685  |
| Mermeladas, otros dulces y jaleas     | Jams, other jams and jellies           | Sweet, candies and sugar | g/d  | 1.976  | 2.982  |
| Miel y similares                      | Honey and similar                      | Sweet, candies and sugar | g/d  | 0.32   | 0.5    |
| Surtidos de dulces, mermeladas y miel | Assortments of candies, jams and honey | Sweet, candies and sugar | g/d  | 0.023  | 0.064  |
| Helado individual                     | Individual ice cream                   | Sweet, candies and sugar | g/d  | 0.926  | 1.601  |
| Helado envasado por kilo o litro      | Ice cream packaged by kilo or liter    | Sweet, candies and sugar | g/d  | 2.523  | 4.442  |
| Helado suelto                         | Loose ice cream                        | Sweet, candies and sugar | g/d  | 1.749  | 3.608  |
| Alfajores                             | Alfajores                              | Sweet, candies and sugar | g/d  | 1.465  | 1.996  |
| Barra de cereales                     | Cereal bars                            | Sweet, candies and sugar | g/d  | 0.128  | 0.282  |
| Bombones y bocaditos de chocolate     | Chocolates and chocolate morsels       | Sweet, candies and sugar | g/d  | 0.086  | 0.117  |
| Caramelos o confites                  | Candies or confectionery               | Sweet, candies and sugar | g/d  | 0.678  | 0.991  |
| Chicles                               | Chewing gum                            | Sweet, candies and sugar | g/d  | 0.079  | 0.128  |
| Chocolate para taza/repostería        | Chocolate for cups/pastries            | Sweet, candies and sugar | g/d  | 0.129  | 0.24   |
| Chocolates y chocolatines             | Chocolates and chocolate bars          | Sweet, candies and sugar | g/d  | 0.599  | 0.99   |
| Chupetines                            | Lollipops                              | Sweet, candies and sugar | g/d  | 0.054  | 0.041  |
| Obleas cubiertas con                  | Chocolate or jam                       | Sweet, candies           | g/d  | 0.057  | 0.093  |

|                                                   |                                                   |                          |      |        |       |
|---------------------------------------------------|---------------------------------------------------|--------------------------|------|--------|-------|
| chocolate o con confituras                        | covered wafers                                    | and sugar                |      |        |       |
| Pastillas en paquete                              | Pastilles in packets                              | Sweet, candies and sugar | g/d  | 0.052  | 0.101 |
| Turrón                                            | Nougat                                            | Sweet, candies and sugar | g/d  | 0.172  | 0.3   |
| Otras golosinas y confituras                      | Other candies and confectionery                   | Sweet, candies and sugar | g/d  | 0.924  | 1.431 |
| Otros preparados de chocolate                     | Other chocolate preparations                      | Sweet, candies and sugar | g/d  | 0.052  | 0.078 |
| Surtidos de chocolates y otros dulces             | Assorted chocolates and other sweets              | Sweet, candies and sugar | g/d  | 0.025  | 0.004 |
| Café instantáneo                                  | Instant coffee                                    | Stimulants               | g/d  | 0.493  | 1.048 |
| Café molido o en grano                            | Ground coffee or coffee beans                     | Stimulants               | g/d  | 0.584  | 1.05  |
| Café en saquitos                                  | Coffee in bags                                    | Stimulants               | g/d  | 0.075  | 0.119 |
| Café en cápsulas o bolsitas para máquinas de café | Coffee in capsules or sachets for coffee machines | Stimulants               | g/d  | 0.027  | 0.02  |
| Capuchino instantáneo                             | Instant cappuccino                                | Stimulants               | g/d  | 0.036  | 0.041 |
| Capuchino en saquitos                             | Cappuccino in bags                                | Stimulants               | g/d  | 0.002  | 0.015 |
| Malta instantánea                                 | Instant malt                                      | Stimulants               | g/d  | 0.03   | 0.078 |
| Té común en hebras, en hoja                       | Common tea in strands, in leaves                  | Stimulants               | g/d  | 0.005  | 0.005 |
| Té común en saquitos                              | Common tea in tea bags                            | Stimulants               | g/d  | 0.818  | 4.189 |
| Té saborizado                                     | Flavored tea                                      | Stimulants               | g/d  | 0.043  | 0.067 |
| Yerba mate                                        | Yerba mate                                        | Stimulants               | g/d  | 16.294 | 22.01 |
| Mate cocido en saquitos                           | Mate tea in bags                                  | Stimulants               | g/d  | 0.252  | 0.33  |
| Cacao con o sin azúcar                            | Cocoa with or without sugar                       | Stimulants               | g/d  | 0.711  | 1.425 |
| Otras infusiones                                  | Other infusions                                   | Stimulants               | g/d  | 0.03   | 0.044 |
| Infusiones preparadas listas para consumir        | Ready-to-drink infusions                          | Stimulants               | g/d  | 0.285  | 0.489 |
| Sal fina                                          | Fine salt                                         | Salt                     | g/d  | 2.882  | 3.772 |
| Sal gruesa                                        | Coarse salt                                       | Salt                     | g/d  | 1.038  | 1.445 |
| Ají molido                                        | Ground chili                                      | Spices                   | g/d  | 0.004  | 0.008 |
| Comino                                            | Cumin                                             | Spices                   | g/d  | 0.022  | 0.014 |
| Orégano                                           | Oregano                                           | Spices                   | g/d  | 0.251  | 0.133 |
| Pimentón                                          | Paprika                                           | Spices                   | g/d  | 0.08   | 0.109 |
| Pimienta                                          | Pepper                                            | Spices                   | g/d  | 0.035  | 0.102 |
| Otras especias                                    | Other spices                                      | Spices                   | g/d  | 0.166  | 0.265 |
| Surtido de sal y especias                         | Assortment of salt and spices                     | Spices                   | g/d  | 0.03   | 0.043 |
| Ketchup                                           | Ketchup                                           | Dressings                | g/d  | 0.283  | 0.513 |
| Mayonesa                                          | Mayonnaise                                        | Dressings                | g/d  | 3.872  | 6.001 |
| Mostaza                                           | Mustard                                           | Dressings                | g/d  | 0.383  | 0.697 |
| Salsa en base a tomate                            | Tomato based sauces                               | Dressings                | g/d  | 1.455  | 2.458 |
| Salsas varias                                     | Various sauces                                    | Dressings                | g/d  | 0.114  | 0.207 |
| Vinagre, aceto balsámico                          | Vinegar, balsamic vinegar                         | Dressings                | g/d  | 1.58   | 2.636 |
| Otros aderezos y condimentos                      | Other dressings and condiments                    | Dressings                | ml/d | 0.047  | 0.09  |
| Surtidos de salsas y condimentos                  | Assortments of sauces and                         | Dressings                | g/d  | 0.019  | 0.053 |

|                                                         |                                                                          |                     |        |         |         |
|---------------------------------------------------------|--------------------------------------------------------------------------|---------------------|--------|---------|---------|
|                                                         | condiments                                                               |                     |        |         |         |
| Alimentos preparados para niños y bebés                 | Prepared foods for children and babies                                   | Other foods         | g/d    | 0.005   | 0.014   |
| Caldos concentrados                                     | Concentrated broths                                                      | Other foods         | g/d    | 0.368   | 0.591   |
| Levadura                                                | Yeast                                                                    | Other foods         | g/d    | 0.21    | 0.287   |
| Polvo para hornear                                      | Baking powders                                                           | Other foods         | g/d    | 0.014   | 0.022   |
| Polvo para bizcochuelo, tortas, scones, budín, brownies | Powder for sponge cake, cakes, scones, pudding, brownies, brownies, etc. | Other foods         | g/d    | 0.519   | 0.806   |
| Polvo para postres y helados                            | Dessert and ice cream powders                                            | Other foods         | g/d    | 0.56    | 0.672   |
| Productos para repostería                               | Confectionery products                                                   | Other foods         | g/d    | 0.13    | 0.162   |
| Sopas concentradas                                      | Concentrated soups                                                       | Other foods         | g/d    | 0.359   | 0.65    |
| Chizitos, papas fritas, palitos (snacks)                | Chizitos, potato chips, snack sticks                                     | Snacks              | g/d    | 1.573   | 2.621   |
| Agua mineral                                            | Mineral water                                                            | Sugar-free drinks   | ml/d   | 55.643  | 102.526 |
| Agua potable                                            | Drinking water                                                           | Sugar-free drinks   | ml/d   | 21.52   | 28.723  |
| Hielo                                                   | Ice                                                                      | Sugar-free drinks   | g/d    | 0.638   | 1.402   |
| Soda                                                    | Soda                                                                     | Sugar-free drinks   | g/d    | 13.282  | 25.448  |
| Gaseosas                                                | Soft drinks                                                              | SSBs                | ml/dia | 157.486 | 203.481 |
| Aperitivo sin alcohol en base a hierbas                 | Non-alcoholic herbal snacks                                              | SSBs                | ml/d   | 2.803   | 6.158   |
| Jugos y refrescos en polvo para preparar bebidas        | Juice and soft drink powders for beverage preparation                    | SSBs                | g/d    | 1.486   | 1.695   |
| Jugos y refrescos líquidos para preparar bebidas        | Liquid juices and soft drinks for beverage preparation                   | SSBs                | ml/d   | 1.686   | 3.522   |
| Jugos y refrescos para beber sin diluir                 | Undiluted juices and soft drinks for beverage preparation                | SSBs                | ml/d   | 8.988   | 14.886  |
| jugos en base de soja saborizados                       | Flavored soy-based juices                                                | SSBs                | ml/d   | 1.014   | 1.024   |
| Aguas saborizadas frutales                              | Fruit flavored waters                                                    | SSBs                | ml/d   | 17.843  | 33.281  |
| Bebidas isotónicas, energizantes                        | Isotonic and energy drinks                                               | SSBs                | ml/d   | 1.146   | 1.5     |
| Surtidos de agua mineral, bebidas gaseosas y jugos      | Assortments of mineral water, soft drinks and juices                     | SSBs                | ml/d   | 0.021   | 0.144   |
| Ginebra, caña, grapa                                    | Gin, cane, grappa                                                        | Alcoholic beverages | ml/d   | 0.029   | 0.036   |
| Whisky                                                  | Whisky                                                                   | Alcoholic beverages | ml/d   | 0.082   | 0.332   |
| Licores                                                 | Liqueurs                                                                 | Alcoholic beverages | ml/d   | 0.06    | 0.273   |
| Otras bebidas destiladas                                | Other distilled beverages                                                | Alcoholic beverages | ml/d   | 0.215   | 0.351   |
| Surtidos de bebidas                                     | Assortments of                                                           | Alcoholic           | ml/d   | 0.028   | 0       |

|                                      |                                   |                     |      |        |        |
|--------------------------------------|-----------------------------------|---------------------|------|--------|--------|
| destiladas                           | distilled beverages               | beverages           |      |        |        |
| Vino común                           | Regular wine                      | Alcoholic beverages | ml/d | 7.522  | 13.036 |
| Vino fino                            | Fine wine                         | Alcoholic beverages | ml/d | 5.796  | 10.661 |
| Vinos dulces o postre o espirituosos | Sweet or dessert wines or spirits | Alcoholic beverages | ml/d | 0.058  | 0.072  |
| Aperitivos                           | Aperitifs                         | Alcoholic beverages | ml/d | 1.328  | 2.544  |
| Sidra                                | Cider                             | Alcoholic beverages | ml/d | 1.859  | 3.593  |
| Vino espumante                       | Sparkling wine                    | Alcoholic beverages | ml/d | 0.314  | 0.332  |
| Otros vinos espumantes               | Other sparkling wines             | Alcoholic beverages | ml/d | 0.087  | 0.068  |
| Surtido de vinos                     | Assortment of wines               | Alcoholic beverages | ml/d | 0.006  | 0.072  |
| Cerveza                              | Beer                              | Alcoholic beverages | ml/d | 24.764 | 40.939 |

Source: own elaboration

**TABLE S2.** Nutrients per 100 grams per food group. Part I

|                       | Water | Energy | Protein | Total fat | Carbohydrate | Fiber | Sugars | Calcium | Iron | Magnesium | Phosphorus | Potassium | Sodium | Zinc | Vitamin C | Thiamin |
|-----------------------|-------|--------|---------|-----------|--------------|-------|--------|---------|------|-----------|------------|-----------|--------|------|-----------|---------|
|                       | grs   | kcal   | grs     | grs       | grs          | grs   | grs    | mg      | mg   | mg        | mg         | mg        | mg     | mg   | mg        | mg      |
| Beef                  | 65.21 | 213.87 | 18.95   | 15.02     | 0.10         | 0.00  | 0.00   | 13.24   | 1.89 | 17.68     | 176.62     | 293.79    | 61.44  | 4.13 | 0.04      | 0.07    |
| Poultry               | 61.74 | 234.83 | 17.44   | 16.34     | 3.58         | 0.32  | 0.00   | 13.35   | 0.93 | 21.29     | 159.79     | 204.25    | 187.54 | 1.22 | 1.23      | 0.06    |
| Pork                  | 65.62 | 190.83 | 18.86   | 12.22     | 0.00         | 0.00  | 0.00   | 14.95   | 0.76 | 21.85     | 195.50     | 321.69    | 52.77  | 1.93 | 0.13      | 0.55    |
| Lam and mutton        | 12.81 | 40.97  | 3.54    | 2.87      | 0.00         | 0.00  | 0.00   | 2.14    | 0.17 | 4.08      | 37.87      | 61.94     | 11.07  | 0.44 | 0.06      | 0.12    |
| Fish and seafood      | 87.23 | 131.56 | 23.93   | 3.25      | 0.07         | 0.00  | 0.00   | 37.43   | 1.14 | 31.89     | 287.66     | 454.03    | 302.52 | 1.30 | 0.83      | 0.09    |
| Processed meats       | 58.88 | 266.71 | 16.40   | 21.00     | 2.11         | 0.10  | 0.20   | 12.46   | 1.66 | 15.20     | 148.03     | 273.16    | 872.94 | 2.60 | 1.95      | 0.19    |
| Other meats           | 8.08  | 19.82  | 2.80    | 0.88      | 0.00         | 0.00  | 0.00   | 27.54   | 0.08 | 3.68      | 40.12      | 37.27     | 48.42  | 0.10 | 0.00      | 0.00    |
| Milk                  | 48.71 | 58.03  | 3.12    | 3.01      | 4.65         | 0.00  | 4.21   | 110.76  | 0.04 | 10.32     | 87.93      | 144.38    | 43.75  | 0.38 | 0.55      | 0.04    |
| Dairy products        | 61.73 | 224.61 | 12.66   | 16.29     | 7.08         | 0.03  | 5.30   | 308.38  | 0.24 | 18.13     | 249.32     | 163.01    | 388.84 | 1.50 | 0.17      | 0.05    |
| Eggs                  | 76.15 | 143.00 | 12.56   | 9.51      | 0.72         | 0.00  | 0.37   | 56.00   | 1.75 | 12.00     | 198.00     | 138.00    | 142.00 | 1.29 | 0.00      | 0.04    |
| Refined grains        | 25.37 | 315.46 | 10.77   | 4.42      | 57.72        | 4.54  | 3.31   | 96.20   | 2.63 | 53.33     | 182.09     | 207.55    | 321.21 | 1.37 | 0.19      | 0.45    |
| Whole grains          | 33.42 | 267.98 | 10.69   | 2.95      | 51.24        | 6.34  | 3.25   | 72.99   | 5.64 | 83.71     | 216.53     | 287.19    | 223.28 | 1.72 | 0.69      | 0.59    |
| Legumes and pulses    | 38.21 | 245.21 | 15.16   | 2.57      | 42.07        | 11.29 | 6.88   | 40.67   | 3.51 | 51.51     | 200.21     | 522.36    | 47.09  | 2.12 | 9.35      | 0.44    |
| Nuts and seeds        | 8.24  | 528.40 | 15.66   | 42.18     | 31.12        | 8.62  | 10.48  | 87.29   | 4.00 | 214.88    | 433.83     | 612.97    | 10.58  | 4.59 | 0.60      | 0.43    |
| Fruits                | 84.21 | 56.29  | 0.76    | 0.35      | 14.23        | 2.19  | 9.77   | 16.29   | 0.20 | 12.35     | 15.83      | 192.92    | 1.22   | 0.10 | 22.86     | 0.04    |
| Vegetables            | 90.64 | 32.60  | 1.39    | 0.27      | 6.97         | 1.86  | 3.05   | 24.61   | 0.61 | 17.26     | 33.32      | 239.71    | 50.45  | 0.24 | 15.17     | 0.06    |
| Starchy vegetables    | 78.70 | 79.23  | 2.05    | 0.09      | 18.03        | 2.12  | 0.91   | 12.43   | 0.80 | 23.11     | 56.62      | 423.15    | 7.39   | 0.30 | 19.56     | 0.08    |
| Oil and fats (plants) | 0.00  | 884.30 | 0.00    | 100.00    | 0.00         | 0.00  | 0.00   | 0.02    | 0.01 | 0.00      | 0.00       | 0.02      | 0.05   | 0.00 | 0.00      | 0.00    |
| Oil and fats (animal) | 0.00  | 901.98 | 0.00    | 100.00    | 0.00         | 0.00  | 0.00   | 0.00    | 0.00 | 0.00      | 0.00       | 0.00      | 0.00   | 0.11 | 0.00      | 0.00    |
| Stimulants            | 0.33  | 42.69  | 0.99    | 0.57      | 8.91         | 0.14  | 2.78   | 22.63   | 0.67 | 36.68     | 19.19      | 223.84    | 35.57  | 0.02 | 0.50      | 0.00    |

|                          |        |        |       |       |       |       |       |          |       |        |        |          |          |      |       |      |
|--------------------------|--------|--------|-------|-------|-------|-------|-------|----------|-------|--------|--------|----------|----------|------|-------|------|
| Sweet, candies and sugar | 10.76  | 354.91 | 1.01  | 3.53  | 82.70 | 0.58  | 77.94 | 24.72    | 0.27  | 8.91   | 28.46  | 53.50    | 19.60    | 0.18 | 0.85  | 0.01 |
| Snacks                   | 2.20   | 522.00 | 6.70  | 34.40 | 53.30 | 3.40  | 0.22  | 18.00    | 2.27  | 64.00  | 172.00 | 1,237.00 | 633.00   | 0.99 | 47.30 | 0.10 |
| Spices                   | 10.31  | 276.55 | 10.65 | 6.83  | 63.96 | 36.95 | 3.27  | 1,004.53 | 25.93 | 235.55 | 203.26 | 1,336.82 | 51.99    | 2.62 | 6.10  | 0.19 |
| Salt                     | 10.04  | 306.62 | 14.61 | 16.40 | 48.25 | 28.37 | 5.88  | 489.12   | 30.29 | 206.45 | 352.69 | 1,907.11 | 2,152.41 | 4.43 | 2.55  | 0.35 |
| Dressings                | 50.66  | 377.58 | 1.14  | 37.96 | 7.06  | 0.71  | 5.65  | 16.76    | 0.47  | 5.92   | 20.95  | 118.29   | 480.40   | 0.13 | 0.44  | 0.03 |
| Other foods              | 11.56  | 346.01 | 9.17  | 14.32 | 45.74 | 1.25  | 14.16 | 73.76    | 2.75  | 28.70  | 156.08 | 296.76   | 8,114.09 | 1.27 | 0.35  | 0.47 |
| Sugar-free drinks        | 100.00 | 0.00   | 0.00  | 0.00  | 0.00  | 0.00  | 0.00  | 17.00    | 0.00  | 0.00   | 0.00   | 0.00     | 4.00     | 0.00 | 0.00  | 0.00 |
| SSBs                     | 87.40  | 43.46  | 0.02  | 0.23  | 10.80 | 0.01  | 10.29 | 2.24     | 0.03  | 2.38   | 8.12   | 11.46    | 4.13     | 0.08 | 1.62  | 0.00 |
| Alcoholic beverages      | 90.04  | 58.29  | 0.24  | 0.01  | 3.29  | 0.01  | 0.76  | 5.57     | 0.14  | 8.28   | 15.17  | 59.39    | 3.75     | 0.05 | 0.04  | 0.00 |

**Source:** own elaboration

**TABLE S2. Nutrients per 100 grams per food group. Part II**

|                          | <b>Riboflavin</b> | <b>Niacin</b> | <b>Vitamin B-6</b> | <b>Folate</b> | <b>Vitamin B-12</b> | <b>Vitamin A</b> | <b>Vitamin E</b> | <b>Vitamin D</b> | <b>Vitamin K</b> |
|--------------------------|-------------------|---------------|--------------------|---------------|---------------------|------------------|------------------|------------------|------------------|
|                          | mg                | mg            | mg                 | mg            | mg                  | mg               | mg               | mg               | mg               |
| Beef                     | 0.00              | 4.46          | 0.40               | 11.75         | 3.61                | 125.96           | 0.21             | 0.12             | 1.40             |
| Poultry                  | 0.00              | 6.74          | 0.30               | 7.08          | 0.33                | 43.81            | 0.51             | 0.14             | 3.93             |
| Pork                     | 0.06              | 5.49          | 112.84             | 1.70          | 0.33                | 2.13             | 0.14             | 0.43             | 0.02             |
| Lam and mutton           | 0.05              | 0.92          | 97.87              | 0.58          | 0.13                | 0.19             | 0.02             | 0.14             | 0.00             |
| Fish and seafood         | 0.10              | 9.40          | 303.37             | 8.93          | 2.37                | 21.17            | 0.90             | 2.36             | 1.57             |
| Processed meats          | 0.10              | 4.66          | 137.48             | 3.37          | 1.23                | 11.35            | 0.34             | 0.60             | 1.64             |
| Other meats              | 0.02              | 0.90          | 14.12              | 0.47          | 0.65                | 6.53             | 0.25             | 2.49             | 0.01             |
| Milk                     | 0.16              | 82.24         | 36.31              | 4.65          | 0.41                | 39.69            | 0.06             | 1.22             | 0.24             |
| Dairy products           | 0.27              | 191.04        | 67.14              | 5.13          | 0.98                | 102.17           | 0.27             | 0.25             | 0.99             |
| Eggs                     | 0.46              | 75.00         | 170.00             | 47.00         | 0.89                | 160.00           | 1.05             | 2.00             | 0.30             |
| Refined grains           | 0.21              | 4,681.16      | 186.41             | 113.66        | 0.02                | 0.77             | 1.23             | 0.00             | 4.98             |
| Whole grains             | 0.34              | 7,093.45      | 184.27             | 63.90         | 0.00                | 1.04             | 1.08             | 0.00             | 4.39             |
| Legumes and pulses       | 0.17              | 1,820.32      | 287.26             | 290.60        | 0.00                | 33.36            | 0.36             | 0.00             | 17.14            |
| Nuts and seeds           | 0.37              | 4,148.33      | 258.56             | 56.38         | 0.00                | 8.10             | 3.86             | 0.00             | 18.76            |
| Fruits                   | 0.04              | 371.30        | 116.60             | 14.94         | 0.00                | 14.92            | 0.21             | 0.00             | 1.46             |
| Vegetables               | 0.05              | 660.35        | 124.91             | 21.50         | 0.00                | 154.68           | 0.48             | 0.00             | 39.47            |
| Starchy vegetables       | 0.03              | 1,069.27      | 294.80             | 15.18         | 0.00                | 13.76            | 0.02             | 0.00             | 2.02             |
| Oil and fats (plants)    | 0.00              | 0.00          | 0.00               | 0.00          | 0.00                | 0.00             | 39.89            | 0.00             | 7.02             |
| Oil and fats (animal)    | 0.00              | 0.00          | 0.00               | 0.00          | 0.00                | 0.00             | 2.49             | 0.92             | 0.00             |
| Stimulants               | 0.00              | 1.78          | 0.00               | 0.00          | 0.00                | 0.40             | 0.00             | 0.00             | 0.12             |
| Sweet, candies and sugar | 0.07              | 99.36         | 14.93              | 2.57          | 0.07                | 21.40            | 0.24             | 0.09             | 0.44             |
| Snacks                   | 0.12              | 4,785.00      | 320.00             | 40.00         | 0.00                | 0.00             | 9.11             | 0.00             | 22.10            |
| Spices                   | 0.41              | 3,754.24      | 773.23             | 132.56        | 0.00                | 186.49           | 14.63            | 0.00             | 362.50           |
| Salt                     | 0.78              | 9,741.11      | 1,654.76           | 23.23         | 0.00                | 1,107.30         | 28.92            | 0.00             | 79.14            |
| Dressings                | 0.02              | 88.86         | 14.04              | 3.17          | 0.06                | 9.19             | 1.71             | 0.10             | 81.57            |
| Other foods              | 0.35              | 4,219.38      | 86.14              | 159.95        | 0.10                | 0.00             | 0.51             | 0.00             | 2.74             |
| Sugar-free drinks        | 0.00              | 0.00          | 0.00               | 0.00          | 0.00                | 0.00             | 0.00             | 0.00             | 0.00             |
| SSBs                     | 0.00              | 0.01          | 0.00               | 0.14          | 0.00                | 0.30             | 0.00             | 0.01             | 0.03             |
| Alcoholic beverages      | 0.01              | 59.51         | 19.36              | 0.36          | 0.00                | 0.00             | 0.00             | 0.00             | 0.00             |

Source: own elaboration



**TABLE S2.** Nutrients per 100 grams per food group. Part III

|                          | <b>Saturated fatty acids</b> | <b>Monounsaturated fatty acids</b> | <b>Polyunsaturated fatty acids</b> | <b>EPA</b> | <b>DHA</b> | <b>Trans fatty acids</b> | <b>Cholesterol</b> |
|--------------------------|------------------------------|------------------------------------|------------------------------------|------------|------------|--------------------------|--------------------|
|                          | grs                          | grs                                | mg                                 | mg         | mg         | grs                      | mg                 |
| Beef                     | 5.90                         | 6.38                               | 479.15                             | 4.08       | 0.55       | 151.08                   | 71.52              |
| Poultry                  | 4.22                         | 7.15                               | 2,215.45                           | 7.36       | 20.96      | 65.95                    | 67.87              |
| Pork                     | 4.06                         | 5.22                               | 945.22                             | 0.16       | 0.49       | 46.75                    | 67.02              |
| Lam and mutton           | 0.97                         | 1.17                               | 0.39                               | 0.00       | 0.00       | 6.60                     | 13.40              |
| Fish and seafood         | 0.56                         | 0.94                               | 813.23                             | 191.58     | 355.47     | 0.66                     | 42.69              |
| Processed meats          | 7.50                         | 9.77                               | 376.62                             | 0.58       | 0.73       | 30.34                    | 74.61              |
| Other meats              | 0.12                         | 0.24                               | 211.62                             | 61.48      | 88.90      | 4.75                     | 9.38               |
| Milk                     | 1.81                         | 0.83                               | 127.76                             | 0.00       | 0.00       | 0.00                     | 10.27              |
| Dairy products           | 9.51                         | 4.80                               | 772.34                             | 2.28       | 2.36       | 350.76                   | 47.96              |
| Eggs                     | 3.13                         | 3.66                               | 1,911.00                           | 0.00       | 58.00      | 38.00                    | 372.00             |
| Refined grains           | 0.98                         | 1.20                               | 1,521.70                           | 0.46       | 0.00       | 45.70                    | 1.70               |
| Whole grains             | 0.52                         | 0.61                               | 1,292.35                           | 0.35       | 0.00       | 7.09                     | 0.00               |
| Legumes and pulses       | 0.29                         | 0.55                               | 1,182.21                           | 0.00       | 0.00       | 0.00                     | 0.00               |
| Nuts and seeds           | 6.23                         | 24.63                              | 10,217.16                          | 5.48       | 0.00       | 20.08                    | 0.00               |
| Fruits                   | 0.06                         | 0.13                               | 75.09                              | 0.00       | 0.00       | 0.00                     | 0.00               |
| Vegetables               | 0.05                         | 0.05                               | 96.60                              | 0.00       | 0.00       | 0.00                     | 0.00               |
| Starchy vegetables       | 0.03                         | 0.00                               | 42.00                              | 0.00       | 0.00       | 0.00                     | 0.00               |
| Oil and fats (plants)    | 10.02                        | 82.24                              | 5,038.41                           | 0.00       | 0.00       | 1.36                     | 0.00               |
| Oil and fats (animal)    | 48.55                        | 42.15                              | 4,887.02                           | 0.00       | 0.00       | 0.00                     | 107.37             |
| Stimulants               | 0.00                         | 0.00                               | 0.01                               | 0.00       | 0.00       | 0.01                     | 0.00               |
| Sweet, candies and sugar | 2.01                         | 1.02                               | 180.63                             | 0.00       | 0.00       | 0.00                     | 12.02              |
| Snacks                   | 8.88                         | 6.16                               | 17,900.00                          | 0.00       | 0.00       | 0.00                     | 0.00               |
| Spices                   | 1.63                         | 2.45                               | 2,031.55                           | 0.00       | 0.00       | 0.00                     | 0.00               |
| Salt                     | 2.22                         | 6.08                               | 6,754.47                           | 0.00       | 0.00       | 0.00                     | 0.00               |
| Dressings                | 5.86                         | 8.52                               | 22,356.43                          | 0.00       | 0.00       | 93.82                    | 20.97              |
| Other foods              | 11.13                        | 1.52                               | 776.86                             | 0.00       | 0.00       | 334.72                   | 4.37               |
| Sugar-free drinks        | 0.00                         | 0.00                               | 0.00                               | 0.00       | 0.00       | 0.00                     | 0.00               |
| SSBs                     | 0.00                         | 0.00                               | 4.53                               | 0.00       | 0.00       | 0.00                     | 0.00               |
| Alcoholic beverages      | 0.00                         | 0.00                               | 0.00                               | 0.00       | 0.00       | 0.00                     | 0.00               |

Source: own elaboration

**TABLE S3.** Classification of the food items from the 2017/2018 National Survey of Household Income and Expenditure (NSHIE) for environmental dimension assessment.

| Food items (Spanish)                                        | Food items (English)                             | Classification | Unit | Average | Improved income |
|-------------------------------------------------------------|--------------------------------------------------|----------------|------|---------|-----------------|
| Aguja                                                       | Needle                                           | Beef           | g/d  | 3.21    | 3.22            |
| Asado                                                       | Roast                                            | Beef           | g/d  | 14.64   | 25.68           |
| Bife ancho                                                  | Wide steak                                       | Beef           | g/d  | 4.34    | 6.99            |
| Bife angosto                                                | Tenderloin steak                                 | Beef           | g/d  | 8.60    | 9.94            |
| Bife de chorizo                                             | Sausage steak                                    | Beef           | g/d  | 0.66    | 1.14            |
| bola de lomo                                                | Tenderloin steak                                 | Beef           | g/d  | 7.01    | 8.42            |
| Carnaza común                                               | Ground beef                                      | Beef           | g/d  | 2.99    | 2.19            |
| Carne picada                                                | Minced meat                                      | Beef           | g/d  | 23.17   | 25.13           |
| Cuadrada                                                    | Square                                           | Beef           | g/d  | 2.77    | 3.17            |
| Cuadril                                                     | Rump                                             | Beef           | g/d  | 4.18    | 7.36            |
| Falda                                                       | Skirt                                            | Beef           | g/d  | 1.55    | 1.98            |
| Hueso con carne                                             | Bone with meat                                   | Beef           | g/d  | 7.86    | 6.91            |
| Hueso sin carne                                             | Bone without meat                                | Beef           | g/d  | 1.24    | 1.89            |
| Lomo                                                        | Loin                                             | Beef           | g/d  | 1.28    | 2.00            |
| Matambre - cima                                             | Sausage - top                                    | Beef           | g/d  | 1.13    | 1.76            |
| Nalga                                                       | Buttock                                          | Beef           | g/d  | 9.75    | 14.74           |
| Paleta                                                      | Shoulder                                         | Beef           | g/d  | 3.94    | 6.28            |
| Palomita                                                    | Dove                                             | Beef           | g/d  | 0.29    | 0.75            |
| Peceto                                                      | Beefsteak                                        | Beef           | g/d  | 1.38    | 2.63            |
| Roast beef                                                  | Roast beef                                       | Beef           | g/d  | 1.71    | 1.85            |
| Vacío                                                       | Beef                                             | Beef           | g/d  | 3.35    | 4.18            |
| Otros cortes                                                | Other cuts                                       | Beef           | g/d  | 3.44    | 4.48            |
| Hígado                                                      | Liver                                            | Beef           | g/d  | 1.53    | 1.52            |
| Lengua de vaca                                              | Beef tongue                                      | Beef           | g/d  | 0.19    | 0.36            |
| Mondongo                                                    | Tripe                                            | Beef           | g/d  | 0.49    | 0.43            |
| Riñón                                                       | Kidney                                           | Beef           | g/d  | 0.13    | 0.17            |
| Otras achuras y menudencias vacunas                         | Other beef offal and giblets                     | Beef           | g/d  | 0.65    | 0.53            |
| Hamburguesas para cocinar (semipreparados)                  | Hamburgers for cooking (semi-prepared)           | Beef           | g/d  | 3.32    | 5.20            |
| Milanasas para cocinar (semipreparados)                     | Breaded meat for cooking (semi-prepared)         | Beef           | g/d  | 8.40    | 19.26           |
| Otros alimentos semipreparados en base a carne para cocinar | Other semi-prepared meat-based foods for cooking | Beef           | g/d  | 0.20    | 0.29            |
| Surtidos de carne fresca vacuna                             | Assortments of fresh beef                        | Beef           | g/d  | 3.59    | 4.79            |
| Carnes en conserva, escabeches                              | Canned meats, pickled meats                      | Beef           | g/d  | 0.01    | 0.00            |
| Otras pastas de carne                                       | Other meat pastes                                | Beef           | g/d  | 0.04    | 0.03            |
| Salchicha criolla                                           | Creole sausage                                   | Beef           | g/d  | 0.27    | 0.40            |
| Salchicha tipo viena con y sin piel                         | Vienna-type sausage with and without skin        | Beef           | g/d  | 0.58    | 0.75            |
| Otros embutidos frescos                                     | Other fresh sausages                             | Beef           | g/d  | 0.06    | 0.08            |
| Surtidos de embutidos frescos                               | Assortments of fresh sausages                    | Beef           | g/d  | 0.03    | 0.01            |
| Matambre (fiambre)                                          | Matambre (cold meat)                             | Beef           | g/d  | 0.04    | 0.05            |
| Salchichón                                                  | Salami                                           | Beef           | g/d  | 0.07    | 0.05            |
| Otros fiambres                                              | Other cold cuts                                  | Beef           | g/d  | 0.19    | 0.31            |
| Surtidos de fiambres                                        | Assortments of cold cuts                         | Beef           | g/d  | 0.90    | 1.33            |
| Picadillo de carne en lata                                  | Canned minced meat in cans                       | Beef           | g/d  | 1.08    | 0.37            |
| Surtidos de procesados en base a carne                      | Assortments of processed meat products           | Beef           | g/d  | 0.00    | 0.00            |
| Pollo entero, medio pollo                                   | Whole chicken, half chicken                      | Chicken        | g/d  | 35.64   | 43.47           |
| Pollo trozado                                               | Chicken cut in pieces                            | Chicken        | g/d  | 30.79   | 33.05           |
| Otras aves                                                  | Other poultry                                    | Chicken        | g/d  | 0.15    | 1.21            |
| Menudencias de ave                                          | Poultry offal                                    | Chicken        | g/d  | 3.85    | 2.51            |

|                                                                |                                                       |                  |     |       |       |
|----------------------------------------------------------------|-------------------------------------------------------|------------------|-----|-------|-------|
| Hamburguesas de pollo                                          | Chicken hamburgers                                    | Chicken          | g/d | 0.74  | 1.22  |
| Supremas de pollo rebozadas                                    | Assorted poultry meat                                 | Chicken          | g/d | 18.00 | 19.30 |
| Preparados de pollo: Formitas, patitas, etc.                   | Chicken preparations: formites, paws, etc.            | Chicken          | g/d | 0.64  | 1.21  |
| Otros alimentos semipreparados en base a pollo para cocinar    | Other semi-prepared chicken-based food for cooking    | Chicken          | g/d | 0.31  | 0.60  |
| Surtidos de carne de ave                                       | Assorted poultry meat                                 | Chicken          | g/d | 0.13  | 0.23  |
| Paté de foie - ave en lata                                     | Canned poultry and foie gras pâté                     | Chicken          | g/d | 0.12  | 0.25  |
| Salchicha tipo viena con y sin piel                            | Vienna-type sausage with and without skin             | Chicken          | g/d | 0.58  | 0.75  |
| Otros embutidos frescos                                        | Other fresh sausages                                  | Chicken          | g/d | 0.06  | 0.08  |
| Surtidos de embutidos frescos                                  | Assortments of fresh sausages                         | Chicken          | g/d | 0.03  | 0.01  |
| Salchichón                                                     | Salami                                                | Chicken          | g/d | 0.07  | 0.05  |
| Surtidos de fiambres                                           | Assortments of cold cuts                              | Chicken          | g/d | 0.90  | 1.33  |
| Picadillo de carne en lata                                     | Canned minced meat in cans                            | Chicken          | g/d | 1.08  | 0.37  |
| Surtidos de procesados en base a carne                         | Assortments of processed meat products                | Chicken          | g/d | 0.00  | 0.00  |
| Lechón entero o medio                                          | Whole or half suckling pig                            | Pork             | g/d | 0.72  | 0.16  |
| Costeleta - chuleta de cerdo                                   | Pork cutlet - pork chop                               | Pork             | g/d | 2.97  | 5.02  |
| Paleta de cerdo                                                | Pork shoulder                                         | Pork             | g/d | 0.41  | 0.40  |
| Lomo cerdo                                                     | Pork loin                                             | Pork             | g/d | 0.18  | 0.33  |
| Carré de cerdo                                                 | Pork rump                                             | Pork             | g/d | 0.64  | 1.65  |
| Pechito de cerdo                                               | Pork brisket                                          | Pork             | g/d | 0.68  | 0.98  |
| Otros cortes de carne porcina                                  | Other pork cuts                                       | Pork             | g/d | 1.61  | 3.28  |
| Achuras y menudencias, porcinas y ovinas                       | Offal and giblets, pork and sheep meat                | Pork             | g/d | 0.14  | 0.07  |
| Otros alimentos semipreparados en base a carne porcina u ovina | Other semi-prepared foods based on pork or sheep meat | Pork             | g/d | 0.17  | 0.33  |
| Chorizo fresco                                                 | Fresh chorizo sausage                                 | Pork             | g/d | 5.78  | 7.35  |
| Morcilla                                                       | Blood sausage                                         | Pork             | g/d | 0.90  | 1.38  |
| Bondiola                                                       | Bondiola                                              | Pork             | g/d | 0.06  | 0.17  |
| Jamón cocido                                                   | Cooked ham                                            | Pork             | g/d | 2.03  | 3.04  |
| Jamón crudo                                                    | Raw ham                                               | Pork             | g/d | 0.15  | 0.22  |
| Lomito                                                         | Tenderloin                                            | Pork             | g/d | 0.05  | 0.14  |
| Mortadela                                                      | Mortadella                                            | Pork             | g/d | 0.61  | 0.90  |
| Paleta (fiambre)                                               | Shoulder (cold meat)                                  | Pork             | g/d | 1.20  | 1.63  |
| Panceta fresca, salada, ahumada                                | Fresh, salted, smoked bacon                           | Pork             | g/d | 0.08  | 0.17  |
| Salame                                                         | Salami                                                | Pork             | g/d | 0.57  | 0.88  |
| Salamín                                                        | Salami                                                | Pork             | g/d | 0.24  | 0.45  |
| Salchicha criolla                                              | Creole sausage                                        | Pork             | g/d | 0.27  | 0.40  |
| Salchicha tipo viena con y sin piel                            | Vienna-type sausage with and without skin             | Pork             | g/d | 0.58  | 0.75  |
| Otros embutidos frescos                                        | Other fresh sausages                                  | Pork             | g/d | 0.06  | 0.08  |
| Surtidos de embutidos frescos                                  | Assortments of fresh sausages                         | Pork             | g/d | 0.03  | 0.01  |
| Matambre (fiambre)                                             | Matambre (cold meat)                                  | Pork             | g/d | 0.04  | 0.05  |
| Salchichón                                                     | Salami                                                | Pork             | g/d | 0.07  | 0.05  |
| Otros fiambres                                                 | Other cold cuts                                       | Pork             | g/d | 0.19  | 0.31  |
| Surtidos de fiambres                                           | Assortments of cold cuts                              | Pork             | g/d | 0.90  | 1.33  |
| Picadillo de carne en lata                                     | Canned minced meat in cans                            | Pork             | g/d | 1.08  | 0.37  |
| Surtidos de procesados en base a carne                         | Assortments of processed meat products                | Pork             | g/d | 0.00  | 0.00  |
| Ovino y caprino, entero o por corte                            | Sheep and goat, whole or by cuts                      | Lamb and mutton  | g/d | 1.47  | 2.28  |
| Surtidos de carne porcina u ovina                              | Assorted pork and mutton products                     | Lamb and mutton  | g/d | 0.13  | 0.32  |
| Other meats                                                    | Other fresh or frozen meats                           | Other meats      | g/d | 0.27  | 0.97  |
| Atún - lomo de atún- salmón- congrio                           | Tuna - tuna loin - salmon - conger eel                | Fish and seafood | g/d | 0.16  | 0.20  |

|                                                                      |                                                                    |                            |          |       |       |
|----------------------------------------------------------------------|--------------------------------------------------------------------|----------------------------|----------|-------|-------|
| Brótola- lenguado                                                    | Forkbeard - sole                                                   | Fish and seafood           | g/d      | 0.05  | 0.12  |
| Merluza                                                              | Hake                                                               | Fish and seafood           | g/d      | 2.25  | 4.66  |
| Pejerrey                                                             | Silverside                                                         | Fish and seafood           | g/d      | 0.06  | 0.11  |
| Surubí                                                               | Surubí                                                             | Fish and seafood           | g/d      | 0.08  | 0.03  |
| Otros pescados de mar                                                | Other sea fish                                                     | Fish and seafood           | g/d      | 1.01  | 0.51  |
| Otros pescados de río                                                | Other river fish                                                   | Fish and seafood           | g/d      | 0.82  | 0.82  |
| Almejas, berberechos, mejillones, cholgas, vieiras                   | Clams, cockles, mussels, mussels, scallops, scallops               | Fish and seafood           | g/d      | 0.06  | 0.11  |
| Calamares                                                            | Squid                                                              | Fish and seafood           | g/d      | 0.06  | 0.08  |
| Langostinos y camarones                                              | Shrimps and prawns                                                 | Fish and seafood           | g/d      | 0.04  | 0.04  |
| Otros mariscos                                                       | Other seafood                                                      | Fish and seafood           | g/d      | 0.02  | 0.01  |
| Filet preparado para cocinar                                         | Ready-to-cook fillets                                              | Fish and seafood           | g/d      | 0.22  | 0.25  |
| Semipreparados congelados en base a pescado y mariscos               | Frozen semi-prepared fish and seafood-based products               | Fish and seafood           | g/d      | 0.48  | 1.40  |
| Surtidos de pescados y mariscos frescos, congelados y semipreparados | Assortments of fresh, frozen and semi-prepared fish, and shellfish | Fish and seafood           | g/d      | 0.12  | 0.58  |
| Atún en conserva                                                     | Canned tuna                                                        | Fish and seafood           | g/d      | 1.21  | 1.94  |
| Caballa en conserva                                                  | Canned mackerel                                                    | Fish and seafood           | g/d      | 0.26  | 0.43  |
| Filet de anchoas                                                     | Anchovy fillets                                                    | Fish and seafood           | g/d      | 0.15  | 0.03  |
| Mariscos en conserva                                                 | Canned seafood                                                     | Fish and seafood           | g/d      | 0.01  | 0.01  |
| Sardinias en conserva                                                | Canned sardines                                                    | Fish and seafood           | g/d      | 0.04  | 0.09  |
| Otras conservas de pescado                                           | Other canned fish                                                  | Fish and seafood           | g/d      | 0.03  | 0.07  |
| Surtidos de pescados y mariscos en conserva                          | Assortments of canned fish and shellfish                           | Fish and seafood           | g/d      | 0.03  | 0.01  |
| Leche común entera                                                   | Regular whole milk                                                 | Fresh milk                 | mlk-eq/d | 45.44 | 65.84 |
| Leche común descremada                                               | Regular skim milk                                                  | Fresh milk                 | mlk-eq/d | 10.89 | 20.29 |
| Leche larga vida entera                                              | Whole long-life milk                                               | Long-life milk             | mlk-eq/d | 12.60 | 20.97 |
| Leche larga vida descremada                                          | Long-life skim milk                                                | Long-life milk             | mlk-eq/d | 4.21  | 5.50  |
| Leche en polvo entera o descremada                                   | Powdered whole or skimmed milk powder                              | Milk powder                | mlk-eq/d | 6.88  | 3.24  |
| Leches preparadas con aditamentos                                    | Prepared milk with additives                                       | Chocolate or flavored milk | mlk-eq/d | 1.49  | 2.21  |
| Otras leches fluidas                                                 | Other fluid milk                                                   | Chocolate or flavored milk | mlk-eq/d | 0.01  | 0.00  |
| leche en polvo fortificada para lactantes                            | Fortified powdered milk for infants                                | Milk powder                | mlk-eq/d | 0.09  | 0.30  |
| leche en fluida fortificada para lactantes                           | Fortified fluid milk for infants                                   | Long-life milk             | mlk-eq/d | 0.01  | 0.00  |
| Queso crema para untar                                               | Cream cheese spreads                                               | Very soft cheeses          | mlk-eq/d | 3.70  | 4.38  |
| Queso de máquina                                                     | Machine cheese                                                     | Semi-hard cheeses          | mlk-eq/d | 4.10  | 4.68  |
| Queso doble crema - cuartirolo                                       | Heavy cream cheese -                                               | Soft cheeses               | mlk-     | 11.58 | 16.61 |

|                                                  |                                                 |                             |          |       |       |
|--------------------------------------------------|-------------------------------------------------|-----------------------------|----------|-------|-------|
|                                                  | cuartirolo                                      |                             | eq/d     |       |       |
| Queso fontina - gouda - chubut - edan - fymbo    | fontina - gouda - chubut - edan - fymbo cheese  | Semi-hard cheeses           | mlk-eq/d | 0.18  | 0.28  |
| Queso fundido                                    | Processed cheese                                | Very soft cheeses           | mlk-eq/d | 0.01  | 0.01  |
| Queso paté-gras - mar del plata                  | Pate-gras cheese - mar del plata                | Soft cheeses                | mlk-eq/d | 0.30  | 0.45  |
| Queso port salut                                 | Port salut cheese                               | Soft cheeses                | mlk-eq/d | 0.70  | 1.19  |
| Queso para rallar                                | Cheese for grating                              | Hard cheeses                | mlk-eq/d | 0.92  | 1.63  |
| Queso rallado                                    | Grated cheese                                   | Hard cheeses                | mlk-eq/d | 0.95  | 1.53  |
| Muzzarella                                       | Mozzarella                                      | Soft cheeses                | mlk-eq/d | 0.75  | 1.44  |
| Ricota                                           | Ricotta                                         | Yogurts and fermented milks | mlk-eq/d | 0.18  | 0.37  |
| Otros quesos                                     | Other cheeses                                   | Yogurts and fermented milks | mlk-eq/d | 0.29  | 0.42  |
| Surtidos de quesos                               | Assorted cheeses                                | Yogurts and fermented milks | mlk-eq/d | 0.10  | 0.23  |
| Crema de leche                                   | Milk cream                                      | Cream                       | mlk-eq/d | 2.50  | 2.51  |
| Yogur natural o saborizado                       | Butter                                          | Yogurts and fermented milks | mlk-eq/d | 21.75 | 29.96 |
| Yogur con aditamentos                            | Natural or flavored yogurt                      | Yogurts and fermented milks | mlk-eq/d | 0.61  | 1.02  |
| Dulce de leche                                   | Yogurt with additives                           | Dulce de leche              | mlk-eq/d | 2.48  | 4.04  |
| Postres lácteos                                  | Dulce de leche                                  | Dairy desserts              | mlk-eq/d | 1.13  | 2.15  |
| Otros productos lácteos                          | Dairy desserts                                  | Dairy desserts              | mlk-eq/d | 0.01  | 0.01  |
| Surtidos de productos lácteos                    | Assortments of dairy products                   | Dairy desserts              | mlk-eq/d | 0.05  | 0.09  |
| Manteca                                          | Butter                                          | Butter                      | mlk-eq/d | 1.48  | 2.38  |
| Huevos de gallina                                | Chicken eggs                                    | Eggs                        | mlk-eq/d | 16.89 | 21.68 |
| Otros huevos                                     | Other eggs                                      | Eggs                        | g/d      | 0.04  | 0.09  |
| Avena                                            | Semolina and semolina                           | Cereals                     | g/d      | 0.39  | 0.68  |
| Cereales en grano                                | Grain cereals                                   | Cereals                     | g/d      | 1.02  | 0.95  |
| Cereales inflados                                | Puffed cereals                                  | Cereals                     | g/d      | 1.05  | 1.85  |
| Féculas                                          | Starch                                          | Cereals                     | g/d      | 0.33  | 0.56  |
| Harina de maíz                                   | Corn flour                                      | Cereals                     | g/d      | 3.08  | 3.16  |
| Harina de trigo                                  | Wheat flour                                     | Cereals                     | g/d      | 24.70 | 24.36 |
| Mezcla de harina para pizza, ñoquis, torta frita | Flour mix for pizza, gnocchi, and torta frita   | Cereals                     | g/d      | 0.90  | 1.36  |
| Mezcla de cereales y fibras o frutas             | Cereal and fiber or fruit mix                   | Cereals                     | g/d      | 0.07  | 0.16  |
| Sémola y semolín                                 | Semolina and semolina                           | Cereals                     | g/d      | 0.43  | 0.58  |
| Harinas integrales                               | Whole grain flours                              | Cereals                     | g/d      | 0.28  | 0.47  |
| Otras harinas, cereales y fibras                 | Other flours, cereals, and fibers               | Cereals                     | g/d      | 0.06  | 0.12  |
| Surtidos de harinas, arroz, cereales y fibras    | Assortments of flours, rice, cereals and fibers | Cereals                     | g/d      | 0.10  | 0.00  |
| Choclo fresco                                    | Fresh corn                                      | Cereals                     | g/d      | 2.12  | 2.10  |
| Choclo en conserva                               | Canned corn                                     | Cereals                     | g/d      | 0.78  | 1.43  |
| Arroz blanco                                     | White rice                                      | Rice                        | g/d      | 25.04 | 26.77 |

|                                                          |                                                        |                |     |       |       |
|----------------------------------------------------------|--------------------------------------------------------|----------------|-----|-------|-------|
| Arroz integral                                           | Brown rice                                             | Rice           | g/d | 0.35  | 0.52  |
| Otros arroces con aditamentos                            | Other rice with additions                              | Rice           | g/d | 0.03  | 0.03  |
| Fideos de arroz                                          | Rice noodles                                           | Rice           | g/d | 0.02  | 0.01  |
| Facturas y churros                                       | Bills and churros                                      | Baked products | g/d | 2.57  | 4.57  |
| Galletas, grisines y tostadas                            | Cookies, breadsticks, and toast                        | Baked products | g/d | 1.56  | 2.91  |
| Galletitas de agua envasadas                             | Packaged water crackers                                | Baked products | g/d | 5.48  | 9.36  |
| Galletitas de agua sueltas                               | Loose water crackers                                   | Baked products | g/d | 0.29  | 0.42  |
| Galletitas dulces envasadas                              | Packaged sweet cookies                                 | Baked products | g/d | 9.92  | 16.50 |
| Galletitas dulces sueltas                                | Loose sweet cookies                                    | Baked products | g/d | 0.23  | 0.50  |
| Galletitas de otro tipo                                  | Other types of cookies                                 | Baked products | g/d | 1.72  | 3.25  |
| Masas secas o finas                                      | Dry or thin doughs                                     | Baked products | g/d | 0.16  | 0.36  |
| Pan envasado en rebanadas blanco                         | Packaged white sliced bread                            | Baked products | g/d | 1.67  | 2.97  |
| Pan envasado en rebanadas integral                       | Whole wheat sliced packaged bread                      | Baked products | g/d | 3.40  | 2.04  |
| Pan tipo francés fresco en piezas                        | Fresh whole wheat bread in pieces                      | Baked products | g/d | 95.07 | 82.54 |
| Pan integral fresco en piezas                            | Fresh French-type bread in pieces                      | Baked products | g/d | 1.12  | 1.55  |
| Pan para hamburguesas - pebetes - panchos                | Bread for hamburgers - pebetes - hot dogs              | Baked products | g/d | 1.28  | 2.27  |
| Pan rallado                                              | Breadcrumbs                                            | Baked products | g/d | 3.04  | 3.78  |
| Pancitos, bollitos, figazzitas saborizados               | Bread rolls, buns, flavored figazzitas                 | Baked products | g/d | 0.22  | 0.25  |
| Panes y panecillos frescos de otro tipo                  | Other fresh bread and rolls                            | Baked products | g/d | 6.98  | 8.19  |
| Panes y panecillos precocidos y congelados               | Pre-baked and frozen bread and rolls                   | Baked products | g/d | 0.11  | 0.18  |
| Pan blanco de molde por pieza                            | White sliced bread by piece                            | Baked products | g/d | 0.63  | 0.72  |
| Tortas, tartas, pan dulce                                | Cakes, pies, sweet bread                               | Baked products | g/d | 1.65  | 3.36  |
| Otros productos de panadería y repostería                | Other bakery and confectionery products                | Baked products | g/d | 1.43  | 1.07  |
| Surtidos de productos de panadería y pastelería          | Assortments of bakery and pastry products              | Baked products | g/d | 1.93  | 1.42  |
| Pizzas preparadas sin cocinar                            | Prepared uncooked pizzas                               | Baked products | g/d | 0.28  | 0.36  |
| Pre-pizza                                                | Pre-pizza                                              | Baked products | g/d | 3.72  | 4.98  |
| Rapiditas, fajitas, etc.                                 | Rapiditas, fajitas, etc.                               | Baked products | g/d | 0.10  | 0.15  |
| Canelones                                                | Cannelloni                                             | Pasta          | g/d | 0.05  | 0.07  |
| Empanadas preparadas sin cocinar                         | Prepared uncooked pies                                 | Pasta          | g/d | 0.06  | 0.12  |
| Fideos frescos                                           | Fresh noodles                                          | Pasta          | g/d | 1.33  | 2.19  |
| Fideos secos                                             | Dried noodles                                          | Pasta          | g/d | 25.50 | 29.06 |
| Ñoquis frescos                                           | Fresh gnocchi                                          | Pasta          | g/d | 0.55  | 1.21  |
| Pastas deshidratadas con y sin relleno                   | Dehydrated pasta with and without filling              | Pasta          | g/d | 0.31  | 0.48  |
| Ravioles frescos                                         | Fresh ravioli                                          | Pasta          | g/d | 3.45  | 5.60  |
| Tapas frescas para canelones, panqueques, lasagnas, etc. | Fresh toppings for cannelloni, pancakes, lasagna, etc. | Pasta          | g/d | 0.03  | 0.08  |
| Tapas frescas para empanadas y pastelitos                | Fresh covers for empanadas and pastries                | Pasta          | g/d | 2.98  | 4.61  |

|                                                                                                                     |                                                                                                            |                    |     |       |       |
|---------------------------------------------------------------------------------------------------------------------|------------------------------------------------------------------------------------------------------------|--------------------|-----|-------|-------|
| Tapas frescas para tartas                                                                                           | Fresh covers for pies                                                                                      | Pasta              | g/d | 2.13  | 3.38  |
| Otras pastas frescas rellenas, tortelletis, fideos rellenos, panzotitis, agnolottis, capellettis, sorrentinos, etc. | Other fresh stuffed pasta, tortelletis, stuffed noodles, panzotitis, agnolottis, capellettis, sorrentinos. | Pasta              | g/d | 0.58  | 1.48  |
| Otros alimentos semipreparados en base a pastas                                                                     | Other semi-prepared pasta-based foods                                                                      | Pasta              | g/d | 0.02  | 0.06  |
| Surtidos de pastas                                                                                                  | Assortments of pasta                                                                                       | Pasta              | g/d | 0.03  | 0.04  |
| Arvejas frescas                                                                                                     | Fresh peas                                                                                                 | Legumes and pulses | g/d | 0.27  | 0.24  |
| Chauchas frescas                                                                                                    | Fresh string beans                                                                                         | Legumes and pulses | g/d | 0.38  | 0.55  |
| Legumbres congeladas                                                                                                | Other fresh legumes                                                                                        | Legumes and pulses | g/d | 0.03  | 0.03  |
| Milanesa de soja                                                                                                    | Soybean Milanese                                                                                           | Legumes and pulses | g/d | 0.07  | 0.10  |
| Arvejas secas                                                                                                       | Dried peas                                                                                                 | Legumes and pulses | g/d | 0.40  | 0.64  |
| Lentejas secas                                                                                                      | Dried lentils                                                                                              | Legumes and pulses | g/d | 0.11  | 0.10  |
| Porotos secos                                                                                                       | Dried beans                                                                                                | Legumes and pulses | g/d | 0.84  | 1.76  |
| Otras legumbres secas                                                                                               | Other dried pulses                                                                                         | Legumes and pulses | g/d | 0.38  | 0.50  |
| Arvejas en conserva                                                                                                 | Canned peas                                                                                                | Legumes and pulses | g/d | 0.07  | 0.06  |
| Lentejas en conserva                                                                                                | Canned lentils                                                                                             | Legumes and pulses | g/d | 1.62  | 2.31  |
| Porotos en conserva                                                                                                 | Canned beans                                                                                               | Legumes and pulses | g/d | 0.19  | 0.32  |
| Otras legumbres en conserva                                                                                         | Other canned pulses                                                                                        | Legumes and pulses | g/d | 0.05  | 0.15  |
| Semillas                                                                                                            | Seeds                                                                                                      | Nuts and seeds     | g/d | 0.05  | 0.08  |
| Frutas secas                                                                                                        | Dried fruits                                                                                               | Nuts and seeds     | g/d | 0.12  | 0.24  |
| Ciruelas disecadas                                                                                                  | Dried plums                                                                                                | Nuts and seeds     | g/d | 0.38  | 0.45  |
| Pasas de uva                                                                                                        | Raisins                                                                                                    | Nuts and seeds     | g/d | 0.04  | 0.19  |
| Ananá                                                                                                               | Pineapple                                                                                                  | Fruits             | g/d | 0.09  | 0.11  |
| Banana                                                                                                              | Banana                                                                                                     | Fruits             | g/d | 0.51  | 0.75  |
| Cerezas, guindas frescas                                                                                            | Cherries, fresh cherries                                                                                   | Fruits             | g/d | 21.18 | 30.76 |
| Ciruela                                                                                                             | Plum                                                                                                       | Fruits             | g/d | 0.34  | 0.68  |
| Damasco                                                                                                             | Apricot                                                                                                    | Fruits             | g/d | 1.03  | 1.72  |
| Durazno                                                                                                             | Peach                                                                                                      | Fruits             | g/d | 0.20  | 0.12  |
| Frutillas frescas                                                                                                   | Fresh strawberries                                                                                         | Fruits             | g/d | 2.66  | 5.52  |
| Kiwi fresco                                                                                                         | Fresh kiwi                                                                                                 | Fruits             | g/d | 1.06  | 1.62  |
| Limón                                                                                                               | Lemon                                                                                                      | Fruits             | g/d | 0.37  | 0.70  |
| Mandarina                                                                                                           | Tangerine                                                                                                  | Fruits             | g/d | 4.00  | 5.44  |
| Manzana                                                                                                             | Apple                                                                                                      | Fruits             | g/d | 7.53  | 10.95 |
| Melón fresco                                                                                                        | Fresh melon                                                                                                | Fruits             | g/d | 13.42 | 20.70 |
| Naranja                                                                                                             | Orange                                                                                                     | Fruits             | g/d | 1.24  | 1.58  |
| Palta fresca                                                                                                        | Fresh avocado                                                                                              | Fruits             | g/d | 15.74 | 22.03 |
| Pelón fresco                                                                                                        | Fresh peel                                                                                                 | Fruits             | g/d | 0.88  | 1.53  |
| Pera                                                                                                                | Pear                                                                                                       | Fruits             | g/d | 0.31  | 0.66  |
| Pomelo fresco                                                                                                       | Fresh grapefruit                                                                                           | Fruits             | g/d | 3.20  | 5.27  |
| Sandía fresca                                                                                                       | Fresh watermelon                                                                                           | Fruits             | g/d | 0.90  | 1.48  |
| Uva fresca                                                                                                          | Fresh grapes                                                                                               | Fruits             | g/d | 3.76  | 6.23  |
| Otras frutas frescas                                                                                                | Other fresh fruits                                                                                         | Fruits             | g/d | 1.68  | 2.50  |
| Frutas congeladas                                                                                                   | Frozen fruits                                                                                              | Fruits             | g/d | 0.17  | 0.35  |

|                                                                               |                                                                              |                    |     |       |       |
|-------------------------------------------------------------------------------|------------------------------------------------------------------------------|--------------------|-----|-------|-------|
| Surtidos de frutas frescas o congeladas                                       | Assortments of fresh or frozen fruits                                        | Fruits             | g/d | 0.00  | 0.00  |
| Ananá en almíbar o en conserva                                                | Pineapple in syrup or preserved                                              | Fruits             | g/d | 4.43  | 6.64  |
| Duraznos en almíbar o en conserva                                             | Peaches in syrup or canned peaches                                           | Fruits             | g/d | 0.13  | 0.15  |
| Ensalada de frutas en almíbar o en conserva                                   | Fruit salad in syrup or preserves                                            | Fruits             | g/d | 1.97  | 3.87  |
| Otras frutas en conserva                                                      | Other canned fruits                                                          | Fruits             | g/d | 0.20  | 0.31  |
| Otras frutas desecadas                                                        | Other dried fruits                                                           | Fruits             | g/d | 0.09  | 0.07  |
| Surtidos de frutas procesadas, secas o en conserva                            | Assortments of processed, dried or canned fruits                             | Fruits             | g/d | 0.03  | 0.23  |
| Acelga                                                                        | Chard                                                                        | Vegetables         | g/d | 0.04  | 0.04  |
| Ají fresco                                                                    | Fresh chili                                                                  | Vegetables         | g/d | 4.85  | 7.32  |
| Ajo                                                                           | Garlic                                                                       | Vegetables         | g/d | 4.68  | 5.44  |
| Albahaca, perejil fresco                                                      | Basil, fresh parsley                                                         | Vegetables         | g/d | 0.10  | 0.15  |
| Alcauciles                                                                    | Artichokes                                                                   | Vegetables         | g/d | 0.08  | 0.08  |
| Apio, hinojo fresco                                                           | Celery, fresh fennel                                                         | Vegetables         | g/d | 0.05  | 0.04  |
| Berenjenas frescas                                                            | Fresh eggplant                                                               | Vegetables         | g/d | 0.58  | 0.77  |
| Cebolla común fresca                                                          | Fresh onion                                                                  | Vegetables         | g/d | 1.38  | 1.96  |
| Cebolla de verdeo, puerro fresco                                              | Green onion, fresh leek                                                      | Vegetables         | g/d | 31.91 | 35.53 |
| Coliflor, brócoli fresco                                                      | Cauliflower, fresh broccoli                                                  | Vegetables         | g/d | 0.84  | 1.14  |
| Espinaca fresca                                                               | Fresh spinach                                                                | Vegetables         | g/d | 0.65  | 1.15  |
| Hongos                                                                        | Mushrooms                                                                    | Vegetables         | g/d | 0.93  | 1.56  |
| Lechuga fresca                                                                | Fresh lettuce                                                                | Vegetables         | g/d | 0.07  | 0.07  |
| Pepino fresco                                                                 | Fresh cucumber                                                               | Vegetables         | g/d | 8.43  | 11.53 |
| Rabanitos                                                                     | Radishes                                                                     | Vegetables         | g/d | 0.54  | 0.72  |
| Radicheta, radicha, rúcula fresca                                             | Fresh radicchio, radicha, fresh arugula                                      | Vegetables         | g/d | 0.06  | 0.19  |
| Remolacha fresca                                                              | Fresh beet                                                                   | Vegetables         | g/d | 0.39  | 0.79  |
| Repollo fresco                                                                | Fresh cabbage                                                                | Vegetables         | g/d | 1.06  | 1.60  |
| Tomate perita fresco                                                          | Fresh pear tomato                                                            | Vegetables         | g/d | 1.26  | 1.54  |
| Tomate redondo fresco                                                         | Fresh round tomato                                                           | Vegetables         | g/d | 18.54 | 21.08 |
| Tomate Cherry                                                                 | Cherry tomato                                                                | Vegetables         | g/d | 18.42 | 25.51 |
| Verdurita, jardinera, ensaladas varias frescas                                | Baby greens, garden vegetables, various fresh salads                         | Vegetables         | g/d | 0.41  | 0.70  |
| Zanahoria fresca                                                              | Fresh carrot                                                                 | Vegetables         | g/d | 0.04  | 0.09  |
| Zapallitos frescos                                                            | Fresh zucchini                                                               | Vegetables         | g/d | 14.14 | 18.26 |
| Zapallo fresco                                                                | Fresh pumpkin                                                                | Vegetables         | g/d | 5.20  | 8.03  |
| Otras verduras y tubérculos frescos                                           | Other fresh vegetables and tubers                                            | Vegetables         | g/d | 14.02 | 17.68 |
| Aceitunas                                                                     | Olives                                                                       | Vegetables         | g/d | 0.50  | 0.96  |
| Verduras congeladas                                                           | Frozen vegetables                                                            | Vegetables         | g/d | 0.26  | 0.40  |
| Semipreparados frescos o congeladas en base a verduras para cocinar           | Semi-prepared fresh or frozen vegetable-based products for cooking           | Vegetables         | g/d | 0.11  | 0.07  |
| Surtidos de verduras, tubérculos y legumbres frescas o congeladas             | Assortments of fresh or frozen vegetables, root vegetables and legumes       | Vegetables         | g/d | 12.26 | 22.00 |
| Tomates en conserva                                                           | Canned tomatoes                                                              | Vegetables         | g/d | 18.01 | 15.93 |
| Verduras en conserva                                                          | Canned vegetables                                                            | Vegetables         | g/d | 0.36  | 0.57  |
| Polvo para puré zapallo deshidratado                                          | Dehydrated pumpkin purée powder                                              | Vegetables         | g/d | 0.00  | 0.00  |
| Otras verduras deshidratadas                                                  | Other dehydrated vegetables                                                  | Vegetables         | g/d | 0.01  | 0.00  |
| Surtidos de verduras, tubérculos y legumbres secas o en conservas y derivadas | Assortments of dried or canned vegetables, tubers and pulses and by-products | Vegetables         | g/d | 0.24  | 0.49  |
| Batata fresca                                                                 | Fresh sweet potato                                                           | Starchy vegetables | g/d | 2.56  | 3.71  |



|                                               |                                                 |                        |      |       |       |
|-----------------------------------------------|-------------------------------------------------|------------------------|------|-------|-------|
| Mandioca fresca                               | Fresh cassava                                   | Starchy vegetables     | g/d  | 1.26  | 0.83  |
| Papa fresca                                   | Fresh potatoes                                  | Starchy vegetables     | g/d  | 91.08 | 96.70 |
| Papas y otros tubérculos congelados           | Potatoes and other frozen tubers                | Starchy vegetables     | g/d  | 0.47  | 1.04  |
| Polvo para puré de papa o batata deshidratado | Dehydrated mashed potato or sweet potato powder | Starchy vegetables     | g/d  | 0.32  | 0.56  |
| Aceite mezcla                                 | Blended oil                                     | Vegetable oil and fats | g/d  | 3.87  | 4.63  |
| Aceite de girasol                             | Sunflower oil                                   | Vegetable oil and fats | g/d  | 19.53 | 26.78 |
| Aceite de maíz                                | Corn oil                                        | Vegetable oil and fats | ml/d | 0.46  | 0.71  |
| Aceite de oliva                               | Olive oil                                       | Vegetable oil and fats | ml/d | 0.55  | 0.94  |
| Aceite de soja                                | Soybean oil                                     | Vegetable oil and fats | ml/d | 0.06  | 0.28  |
| Otros aceites                                 | Other oils                                      | Vegetable oil and fats | ml/d | 0.02  | 0.00  |
| Surtidos de aceites                           | Assortments of oils                             | Vegetable oil and fats | ml/d | 0.02  | 0.00  |
| Margarina                                     | Margarine                                       | Vegetable oil and fats | ml/d | 0.24  | 0.51  |
| Surtidos de aceites                           |                                                 | Vegetable oil and fats | ml/d | 0.015 | 0     |
| Margarina                                     |                                                 | Vegetable oil and fats | g/d  | 0.239 | 0.51  |

**Source:** own elaboration

**TABLE S4.** Coefficient factor for mass changes (farm gate weight to retail weight) and environmental indicators per kg of food at the farm gate. Part I

| <b>Food items</b>      | <b>Coefficient factor FW-RW</b> | <b>GHG emissions</b>      | <b>Fossil energy use</b> | <b>Land occupation</b> | <b>Cropland demand</b> | <b>Freshwater consumption</b> | <b>Eutrophication potential</b> |
|------------------------|---------------------------------|---------------------------|--------------------------|------------------------|------------------------|-------------------------------|---------------------------------|
|                        | %                               | kg CO <sub>2</sub> -eq/kg | MJ/kg                    | m <sup>2</sup> /kg     | m <sup>2</sup> /kg     | L/kg                          | g PO <sub>4</sub> -eq/kg        |
| Beef                   | 72%                             | 40.93                     | 24.43                    | 251.63                 | 13.38                  | 130.77                        | 42.53                           |
| Poultry                | 75%                             | 0.99                      | 11.20                    | 6.87                   | 6.87                   | 75.00                         | 16.34                           |
| Pork                   | 68%                             | 2.24                      | 16.11                    | 9.86                   | 9.86                   | 238.67                        | 16.33                           |
| Lamb and mutton        | 71%                             | 35.80                     | 22.65                    | 127.80                 | 0.00                   | 189.57                        | 352.87                          |
| Other meats            | 71%                             | 35.80                     | 22.65                    | 127.80                 | 0.00                   | 189.57                        | 352.87                          |
| Fish and seafood       | 51%                             | 1.83                      | 27.52                    | 0.01                   | 0.00                   | 0.00                          | 2.45                            |
| Dairy products         | 105%                            | 1.14                      | 2.57                     | 2.98                   | 1.59                   | 25.00                         | 11.98                           |
| Eggs                   | 100%                            | 1.32                      | 9.67                     | 6.20                   | 6.20                   | 57.00                         | 12.07                           |
| Cereals (without rice) | 65%                             | 0.82                      | 3.51                     | 4.60                   | 4.60                   | 435.00                        | 3.90                            |
| Rice                   | 49%                             | 1.68                      | 7.85                     | 1.80                   | 1.80                   | 448.00                        | 10.00                           |
| Baked products         | 119.27 %                        | 0.71                      | 2.20                     | 5.45                   | 5.45                   | 11.00                         | 4.62                            |
| Pasta                  | 59.21 %                         | 0.71                      | 2.20                     | 5.45                   | 5.45                   | 11.00                         | 4.62                            |

|                      |     |      |       |       |       |        |       |
|----------------------|-----|------|-------|-------|-------|--------|-------|
| Legumes and pulses   | 78% | 0.22 | 2.31  | 4.30  | 4.30  | 33.00  | 2.50  |
| Nuts and seeds       | 50% | 2.01 | 27.33 | 0.33  | 0.33  | 852.00 | 3.62  |
| Fruits               | 51% | 0.18 | 1.38  | 0.40  | 0.40  | 239.00 | 10.00 |
| Vegetables (outdoor) | 51% | 0.34 | 2.52  | 0.48  | 0.48  | 140.00 | 0.61  |
| Starchy vegetables   | 63% | 0.13 | 1.27  | 0.33  | 0.33  | 51.00  | 1.20  |
| Oil crops            | 29% | 1.72 | 17.78 | 10.70 | 10.70 | 11.00  | 18.36 |

## Description

1) “Arrieta et al., unpublished results” correspond to a manuscript entitled “*Environmental footprints of meat, milk and egg production in Argentina*”, which was under consideration for publication in a journal when the present work was being reviewed. This work condenses and expands on previous work on life cycle analysis of animal farming, such as Arrieta et al. (2018) *Sci Tot Environ* 673, 20-28, Arrieta & González (2019) *Sci Tot Environ* 625, 199-208, and Arrieta et al. (2020) *Agric Syst* 185,102944. The final version of the mentioned manuscript is available under request to the corresponding author.

2) Clark & Tilman, 2017: Clark, M., & Tilman, D. (2017). Comparative analysis of environmental impacts of agricultural production systems, agricultural input efficiency, and food choice. *Environmental Research Letters*, 12(6), 064016.

3) Mekonnen & Hoekstra, 2011: Mekonnen, M.M. & Hoekstra, A.Y. (2011) The green, blue and grey water footprint of crops and derived crop products, *Hydrology and Earth System Sciences*, 15(5): 1577-1600

4) Mekonnen & Hoekstra, 2012: Mekonnen, M. M., & Hoekstra, A. Y. (2012). A global assessment of the water footprint of farm animal products. *Ecosystems*, 15(3), 401-415.

- 5) Rööös et al., 2014: Rööös, E., Sundberg, C., Tidåker, P., et al. (2013). Can carbon footprint serve as an indicator of the environmental impact of meat production?. *Ecological Indicators*, 24, 573-581.
- 6) Bartzas et al., 2017: Bartzas, G., Vamvuka, D., & Komnitsas, K. (2017). Comparative life cycle assessment of pistachio, almond and apple production. *Information Processing in Agriculture*, 4(3), 188-198.
- 7) Poore, J., & Nemecek, T. (2018). Reducing food's environmental impacts through producers and consumers. *Science*, 360(6392), 987-992.
- 8) Gustavsson, J., Cederberg, C., Sonesson, U., et al. (2011). *Global food losses and food waste*. Food and Agriculture Organization. Rome, Italy.
- 9) Pernellet, F., Coelho, C. R., & van der Werf, H. M. (2017). Methods to simplify diet and food life cycle inventories: accuracy versus data-collection resources. *Journal of Cleaner Production*, 140, 410-420.

**Source:** own elaboration

**TABLE S4.** Coefficient factor for mass changes (farm gate weight to retail weight) and environmental indicators per kg of food at the farm gate. Part II

| <b>Food items</b>      | <b>Coefficient factor FW-RW</b>                  | <b>GHG emisions</b>                 | <b>Fossil energy use</b>            | <b>Land occupation</b>              | <b>Cropland demand</b>              | <b>Freshwater consumption</b> | <b>Eutrophication potential (*)</b> |
|------------------------|--------------------------------------------------|-------------------------------------|-------------------------------------|-------------------------------------|-------------------------------------|-------------------------------|-------------------------------------|
| Beef                   | Poore & Nemecek, 2018                            | Arrieta et al., unpublished results | Mekonnen & Hoekstra, 2012     | Röös et al., 2013                   |
| Poultry                | Poore & Nemecek, 2018                            | Arrieta et al., unpublished results | Mekonnen & Hoekstra, 2012     | Röös et al., 2013                   |
| Pork                   | Poore & Nemecek, 2018                            | Arrieta et al., unpublished results | Mekonnen & Hoekstra, 2012     | Röös et al., 2013                   |
| Lamb and mutton        | Poore & Nemecek, 2018                            | Clark & Tilman, 2017                | Mekonnen & Hoekstra, 2012     | Clark & Tilman, 2017                |
| Other meats            | Poore & Nemecek, 2018                            | Clark & Tilman, 2017                | Mekonnen & Hoekstra, 2012     | Clark & Tilman, 2017                |
| Fish and seafood       | Pernollet et al., 2017 + Gustvasson et al., 2011 | Pernollet et al., 2017              | Mekonnen & Hoekstra, 2012     | Pernollet et al., 2017              |
| Dairy products         | Pernollet et al., 2017 + Gustvasson et al., 2011 | Arrieta et al., unpublished results | Mekonnen & Hoekstra, 2012     | Röös et al., 2013                   |
| Eggs                   | Pernollet et al., 2017 + Gustvasson et al., 2011 | Arrieta et al., unpublished results | Mekonnen & Hoekstra, 2012     | Röös et al., 2013                   |
| Cereals (without rice) | Pernollet et al., 2017 + Gustvasson et al., 2011 | Clark & Tilman, 2017                | Mekonnen & Hoekstra, 2011     | Clark & Tilman, 2017                |
| Rice                   | Pernollet et al., 2017 +                         | Clark & Tilman,                     | Clark & Tilman,                     | Clark & Tilman, 2017                | Clark & Tilman,                     | Mekonnen & Hoekstra, 2011     | Clark & Tilman, 2017                |

|                      |                                                  |                      |                      |                      |                      |                           |                      |
|----------------------|--------------------------------------------------|----------------------|----------------------|----------------------|----------------------|---------------------------|----------------------|
|                      | Gustvasson et al., 2011                          | 2017                 | 2017                 |                      | 2017                 |                           |                      |
| Baked products       | Pernollet et al., 2017 + Gustvasson et al., 2011 | Clark & Tilman, 2017 | Mekonnen & Hoekstra, 2011 | Clark & Tilman, 2017 |
| Pasta                | Pernollet et al., 2017 + Gustvasson et al., 2011 | Clark & Tilman, 2017 | Mekonnen & Hoekstra, 2011 | Clark & Tilman, 2017 |
| Legumes and pulses   | Pernollet et al., 2017 + Gustvasson et al., 2011 | Clark & Tilman, 2017 | Mekonnen & Hoekstra, 2011 | Clark & Tilman, 2017 |
| Nuts and seeds       | Pernollet et al., 2017 + Gustvasson et al., 2011 | Bartzas et al., 2017 | Mekonnen & Hoekstra, 2011 | Bartzas et al., 2017 |
| Fruits               | Pernollet et al., 2017 + Gustvasson et al., 2011 | Clark & Tilman, 2017 | Mekonnen & Hoekstra, 2011 | Clark & Tilman, 2017 |
| Vegetables (outdoor) | Pernollet et al., 2017 + Gustvasson et al., 2011 | Clark & Tilman, 2017 | Mekonnen & Hoekstra, 2011 | Clark & Tilman, 2017 |
| Starchy vegetables   | Pernollet et al., 2017 + Gustvasson et al., 2011 | Clark & Tilman, 2017 | Mekonnen & Hoekstra, 2011 | Clark & Tilman, 2017 |
| Oil crops            | Pernollet et al., 2017 + Gustvasson et al., 2011 | Clark & Tilman, 2017 | Mekonnen & Hoekstra, 2011 | Clark & Tilman, 2017 |

## Description

1) “Arrieta et al., unpublished results” correspond to a manuscript entitled “*Environmental footprints of meat, milk and egg production in Argentina*”, which was under consideration for publication in a journal when the present work was being reviewed. This work condenses and expands on previous work on life cycle analysis of animal farming, such as Arrieta et al. (2018) *Sci Tot Environ* 673, 20-28, Arrieta &

González (2019) *Sci Tot Environ* 625, 199-208, and Arrieta et al. (2020) *Agric Syst* 185,102944. The final version of the mentioned manuscript is available under request to the corresponding author.

2) Clark & Tilman, 2017: Clark, M., & Tilman, D. (2017). Comparative analysis of environmental impacts of agricultural production systems, agricultural input efficiency, and food choice. *Environmental Research Letters*, 12(6), 064016.

3) Mekonnen & Hoekstra, 2011: Mekonnen, M.M. & Hoekstra, A.Y. (2011) The green, blue and grey water footprint of crops and derived crop products, *Hydrology and Earth System Sciences*, 15(5): 1577-1600

4) Mekonnen & Hoekstra, 2012: Mekonnen, M. M., & Hoekstra, A. Y. (2012). A global assessment of the water footprint of farm animal products. *Ecosystems*, 15(3), 401-415.

5) Rööös et al., 2014: Rööös, E., Sundberg, C., Tidåker, P., et al. (2013). Can carbon footprint serve as an indicator of the environmental impact of meat production?. *Ecological Indicators*, 24, 573-581.

6) Bartzas et al., 2017: Bartzas, G., Vamvuka, D., & Komnitsas, K. (2017). Comparative life cycle assessment of pistachio, almond and apple production. *Information Processing in Agriculture*, 4(3), 188-198.

7) Poore, J., & Nemecek, T. (2018). Reducing food's environmental impacts through producers and consumers. *Science*, 360(6392), 987-992.

8) Gustavsson, J., Cederberg, C., Sonesson, U., et al. (2011). *Global food losses and food waste*. Food and Agriculture Organization. Rome, Italy.

9) Pernollet, F., Coelho, C. R., & van der Werf, H. M. (2017). Methods to simplify diet and food life cycle inventories: accuracy versus data-collection resources. *Journal of Cleaner Production*, 140, 410-420.

**Source:** own elaboration

**TABLE S5.** Monetary cost (in American dollars) per 100 grams per food group.

| <b>Food items</b>        | <b>Unit</b> | <b>Cost</b> |
|--------------------------|-------------|-------------|
| Beef                     | USD         | 0.52        |
| Poultry                  | USD         | 0.33        |
| Pork                     | USD         | 0.59        |
| Lam and mutton           | USD         | 0.63        |
| Fish and seafood         | USD         | 0.51        |
| Processed meats          | USD         | 0.44        |
| Other meats              | USD         | 0.42        |
| Milk                     | USD         | 0.07        |
| Dairy products           | USD         | 0.37        |
| Eggs                     | USD         | 0.29        |
| Refined grains           | USD         | 0.19        |
| Whole grains             | USD         | 0.22        |
| Legumes and pulses       | USD         | 0.21        |
| Nuts and seeds           | USD         | 0.75        |
| Fruits                   | USD         | 0.16        |
| Vegetables               | USD         | 0.13        |
| Starchy vegetables       | USD         | 0.06        |
| Oil and fats (plants)    | USD         | 0.18        |
| Oil and fats (animal)    | USD         | 0.15        |
| Stimulants               | USD         | 0.34        |
| Sweet, candies and sugar | USD         | 0.31        |
| Snacks                   | USD         | 0.81        |
| Spices                   | USD         | 0.96        |
| Salt                     | USD         | 0.12        |
| Dressings                | USD         | 0.28        |
| Other foods              | USD         | 0.64        |
| Sugar-free drinks        | USD         | 0.04        |
| SSBs                     | USD         | 0.10        |
| Alcoholic beverages      | USD         | 0.27        |

**Source:** own elaboration



**TABLE S6.** Food domestic supply in Argentina (average 2016-2018).

| Food items               | Total Production | Total Exports | Total Imports | Total Domestic supply | Domestic supply from imports |
|--------------------------|------------------|---------------|---------------|-----------------------|------------------------------|
|                          | tons/year        | tons/year     | tons/year     | tons/year             |                              |
| Alcohol, Non-Food        | 261.33           | 11.33         | 15.33         | 264.67                | 6%                           |
| Apples and products      | 476.00           | 136.33        | 5.67          | 388.33                | 1%                           |
| Aquatic Animals, Others  | 0.01             | 0.01          | 0.03          | 0.02                  | <b>114%</b>                  |
| Aquatic Plants           | 0.00             | 0.18          | 0.98          | 0.80                  | <b>122%</b>                  |
| Bananas                  | 175.00           | 0.00          | 456.67        | 631.67                | <b>72%</b>                   |
| Barley and products      | 4,580.33         | 3,417.33      | 5.00          | 871.67                | 1%                           |
| Beans                    | 418.00           | 384.33        | 1.00          | 69.00                 | 1%                           |
| Beer                     | 1,866.67         | 58.67         | 56.67         | 1,781.00              | 3%                           |
| Beverages, Alcoholic     | 69.33            | 5.67          | 10.33         | 77.00                 | 13%                          |
| Beverages, Fermented     | 3.67             | 15.33         | 0.00          | -11.33                | 0%                           |
| Bovine Meat              | 2,851.67         | 344.33        | 5.67          | 2,515.67              | 0%                           |
| Butter, Ghee             | 34.00            | 5.33          | 0.33          | 29.67                 | 1%                           |
| Cassava and products     | 192.67           | 0.00          | 7.00          | 200.00                | 4%                           |
| Cephalopods              | 86.13            | 66.49         | 1.20          | 20.85                 | 6%                           |
| Cereals, Other           | 130.67           | 57.00         | 1.67          | 43.33                 | 4%                           |
| Citrus, Other            | 1.33             | 0.00          | 0.00          | 1.33                  | 0%                           |
| Cloves                   | 0.00             | 0.00          | 0.00          | 0.00                  | 0%                           |
| Cocoa Beans and products | 0.00             | 0.00          | 10.00         | 10.00                 | <b>100%</b>                  |
| Coconut Oil              | 0.00             | 0.00          | 4.00          | 4.00                  | <b>100%</b>                  |
| Coconuts - Incl Copra    | 0.00             | 0.00          | 3.00          | 3.00                  | <b>100%</b>                  |
| Coffee and products      | 0.00             | 0.67          | 35.33         | 34.67                 | <b>102%</b>                  |
| Cottonseed               | 356.67           | 33.33         | 0.00          | 380.00                | 0%                           |
| Cottonseed Oil           | 12.33            | 5.67          | 0.00          | 4.00                  | 0%                           |

|                                       |           |           |       |           |            |
|---------------------------------------|-----------|-----------|-------|-----------|------------|
| Cream                                 | 3.33      | 0.00      | 0.00  | 3.33      | 0%         |
| Crustaceans                           | 224.16    | 177.01    | 1.74  | 48.90     | 4%         |
| Dates                                 | 0.00      | 0.00      | 0.00  | 0.00      | 0%         |
| Demersal Fish                         | 416.73    | 291.58    | 0.70  | 125.85    | 1%         |
| Eggs                                  | 814.67    | 6.33      | 0.00  | 808.33    | 0%         |
| Fats, Animals,<br>Raw                 | 326.33    | 86.33     | 11.67 | 210.00    | 6%         |
| Fish, Body Oil                        | 0.87      | 0.64      | 0.46  | 0.68      | <b>67%</b> |
| Fish, Liver Oil                       | 0.00      | 0.00      | 0.00  | 0.00      | 0%         |
| Freshwater Fish                       | 24.57     | 22.88     | 11.43 | 13.13     | <b>87%</b> |
| Fruits, Other                         | 949.33    | 497.33    | 60.00 | 538.00    | 11%        |
| Grapefruit and<br>products            | 109.33    | 15.00     | 12.33 | 106.33    | 12%        |
| Grapes and<br>products (excl<br>wine) | 2,098.67  | 271.00    | 3.67  | 1,826.33  | 0%         |
| Groundnut Oil                         | 90.00     | 72.00     | 0.00  | 4.00      | 0%         |
| Groundnuts                            | 984.33    | 756.00    | 0.67  | 328.67    | 0%         |
| Honey                                 | 74.33     | 73.33     | 0.00  | 5.33      | 0%         |
| Infant food                           | 0.00      | 14.33     | 1.00  | -13.00    | -8%        |
| Lemons, Limes<br>and products         | 1,781.00  | 1,037.67  | 10.33 | 754.33    | 1%         |
| Maize and<br>products                 | 44,243.67 | 23,867.00 | 8.67  | 19,384.67 | 0%         |
| Maize Germ Oil                        | 45.33     | 23.33     | 0.00  | 19.00     | 0%         |
| Marine Fish,<br>Other                 | 0.21      | 0.00      | 0.00  | 0.21      | 0%         |
| Meat, Other                           | 74.67     | 18.67     | 0.67  | 56.33     | 1%         |
| Milk - Excluding<br>Butter            | 10,305.67 | 1,463.67  | 22.67 | 9,027.33  | 0%         |
| Millet and<br>products                | 4.67      | 3.50      | 0.00  | 2.33      | 0%         |
| Miscellaneous                         | 0.00      | 76.33     | 42.67 | -33.33    | -128%      |
| Molluscs, Other                       | 38.11     | 17.47     | 12.24 | 32.88     | 37%        |
| Mutton & Goat<br>Meat                 | 58.00     | 1.67      | 0.00  | 56.33     | 0%         |
| Nuts and products                     | 19.00     | 4.00      | 4.33  | 17.67     | 25%        |
| Oats                                  | 610.00    | 3.33      | 1.00  | 608.00    | 0%         |

|                                 |          |          |       |          |             |
|---------------------------------|----------|----------|-------|----------|-------------|
| Offals, Edible                  | 547.00   | 89.67    | 0.00  | 457.33   | 0%          |
| Oilcrops Oil,<br>Other          | 233.33   | 278.67   | 22.33 | -28.00   | -80%        |
| Oilcrops, Other                 | 75.67    | 29.67    | 0.00  | 47.33    | 0%          |
| Olive Oil                       | 35.00    | 24.33    | 0.67  | 8.67     | 8%          |
| Olives (including<br>preserved) | 317.33   | 60.00    | 0.00  | 270.33   | 0%          |
| Onions                          | 657.67   | 68.00    | 10.67 | 601.00   | 2%          |
| Oranges,<br>Mandarines          | 1,474.33 | 167.00   | 45.33 | 1,352.67 | 3%          |
| Palm kernels                    | 0.00     | 0.00     | 0.00  | 0.00     | 0%          |
| Palm Oil                        | 0.00     | 0.00     | 4.00  | 4.00     | <b>100%</b> |
| Palmkernel Oil                  | 0.00     | 0.00     | 12.33 | 12.33    | <b>100%</b> |
| Peas                            | 123.33   | 79.33    | 0.33  | 49.67    | 1%          |
| Pelagic Fish                    | 22.12    | 7.09     | 48.64 | 63.68    | <b>76%</b>  |
| Pepper                          | 0.00     | 0.00     | 1.33  | 1.33     | <b>100%</b> |
| Pigmeat                         | 569.67   | 5.00     | 34.33 | 590.67   | 6%          |
| Pimento                         | 3.00     | 0.00     | 1.00  | 4.00     | 25%         |
| Pineapples and<br>products      | 3.00     | 0.00     | 34.33 | 37.67    | <b>91%</b>  |
| Plantains                       | 0.00     | 0.00     | 1.00  | 1.00     | <b>100%</b> |
| Potatoes and<br>products        | 2,421.00 | 399.67   | 36.00 | 2,070.67 | 2%          |
| Poultry Meat                    | 2,125.67 | 186.00   | 10.33 | 1,949.67 | 1%          |
| Pulses, Other and<br>products   | 168.00   | 155.00   | 4.00  | 38.00    | 11%         |
| Rape and Mustard<br>Oil         | 2.33     | 0.50     | 3.00  | 4.33     | <b>69%</b>  |
| Rape and<br>Mustardseed         | 50.67    | 26.67    | 1.00  | 34.33    | 3%          |
| Rice and products               | 1,367.00 | 645.00   | 12.33 | 724.33   | 2%          |
| Roots, Other                    | 0.00     | 0.00     | 0.00  | 0.00     | 0%          |
| Rye and products                | 75.33    | 0.50     | 0.00  | 75.00    | 0%          |
| Sesame seed                     | 0.00     | 5.00     | 1.00  | -4.00    | -25%        |
| Sesameseed Oil                  | 0.00     | 0.00     | 0.00  | 0.00     | 0%          |
| Sorghum and<br>products         | 2,373.00 | 408.33   | 0.00  | 1,965.33 | 0%          |
| Soyabean Oil                    | 7,995.33 | 4,916.00 | 0.33  | 2,902.33 | 0%          |

|                        |           |           |          |           |            |
|------------------------|-----------|-----------|----------|-----------|------------|
| Soyabeans              | 50,519.67 | 6,629.33  | 3,065.33 | 48,067.67 | 6%         |
| Spices, Other          | 7.67      | 6.67      | 2.33     | 3.33      | <b>70%</b> |
| Sugar (Raw Equivalent) | 1,952.67  | 356.00    | 12.67    | 1,794.67  | 1%         |
| Sugar beet             | 0.00      | 0.00      | 0.00     | 0.00      | 0%         |
| Sugar cane             | 18,851.00 | 0.00      | 0.00     | 18,851.00 | 0%         |
| Sunflower seed         | 3,361.67  | 127.33    | 0.00     | 3,250.33  | 0%         |
| Sunflowerseed Oil      | 1,251.33  | 641.00    | 0.00     | 678.67    | 0%         |
| Sweet potatoes         | 337.67    | 0.00      | 8.67     | 346.33    | 3%         |
| Sweeteners, Other      | 355.33    | 88.33     | 23.33    | 281.33    | 8%         |
| Tea (including mate)   | 374.00    | 109.33    | 0.67     | 265.33    | 0%         |
| Tomatoes and products  | 655.67    | 13.00     | 50.00    | 693.00    | 7%         |
| Vegetables, Other      | 2,207.67  | 104.33    | 52.00    | 2,155.33  | 2%         |
| Wheat and products     | 16,096.00 | 12,516.00 | 13.00    | 5,414.33  | 0%         |
| Wine                   | 1,193.00  | 251.00    | 31.33    | 1,069.67  | 3%         |

Source: FAOSTAT.

**TABLE S7.** Dietary quality assessment by using the 10-dimensional Alternate Healthy Eating Index.

| <b>Food items</b>           | <b>Baseline</b> | <b>BAU</b>   | <b>NDG</b>   | <b>EL</b>    | <b>EL-ARG</b> | <b>EL-NRM</b> | <b>EL-LOV</b> | <b>EL-VEG</b> |
|-----------------------------|-----------------|--------------|--------------|--------------|---------------|---------------|---------------|---------------|
| Whole fruit                 | 2.50            | 3.90         | 10.00        | 9.40         | 9.40          | 9.40          | 9.40          | 10.00         |
| Total vegetables            | 4.40            | 5.60         | 10.00        | 10.00        | 10.00         | 10.00         | 10.00         | 10.00         |
| Whole grains                | 0.40            | 0.50         | 6.70         | 10.00        | 7.70          | 7.70          | 10.00         | 10.00         |
| Sugar sweetened beverages   | 1.60            | 0.00         | 10.00        | 10.00        | 10.00         | 10.00         | 10.00         | 10.00         |
| Nuts and legumes            | 1.10            | 1.50         | 10.00        | 10.00        | 10.00         | 10.00         | 10.00         | 10.00         |
| Red and/or processed meats  | 0.50            | 0.00         | 5.30         | 8.00         | 2.40          | 6.20          | 10.00         | 10.00         |
| Trans fats                  | 10.00           | 10.00        | 10.00        | 10.00        | 10.00         | 10.00         | 10.00         | 10.00         |
| Long chain fats (EPA + DHA) | 3.10            | 4.10         | 10.00        | 10.00        | 7.50          | 10.00         | 1.50          | 0.20          |
| PUFAs                       | 3.10            | 3.30         | 2.60         | 10.00        | 10.00         | 10.00         | 10.00         | 10.00         |
| Sodium                      | 6.10            | 3.10         | 6.40         | 7.10         | 7.70          | 7.30          | 7.50          | 8.60          |
| <b>Total</b>                | <b>32.90</b>    | <b>32.00</b> | <b>81.10</b> | <b>94.50</b> | <b>84.70</b>  | <b>90.60</b>  | <b>88.40</b>  | <b>88.80</b>  |

Source: own elaboration

**TABLE S8.** Food demand at the farm gate and percentage of change by dietary scenario.

| <b>Food demand</b>                                                              |             |                 |            |            |               |               |               |               |               |
|---------------------------------------------------------------------------------|-------------|-----------------|------------|------------|---------------|---------------|---------------|---------------|---------------|
| <b>Food items</b>                                                               | <b>Unit</b> | <b>Baseline</b> | <b>BAU</b> | <b>NDG</b> | <b>EL</b>     | <b>EL-ARG</b> | <b>EL-NRM</b> | <b>EL-LOV</b> | <b>EL-VEG</b> |
| Beef                                                                            | t CW        | 2,114,781       | 2,909,829  | 641,508    | 274,932       | 1,570,962     | 0             | 0             | 0             |
| Poultry                                                                         | t CW        | 1,442,462       | 1,647,471  | 488,442    | 610,552       | 581,449       | 1,162,898     | 0             | 0             |
| Pork                                                                            | t CW        | 415,571         | 1,147,666  | 832,775    | 356,903       | 679,782       | 1,359,564     | 0             | 0             |
| Lamb and mutton                                                                 | t CW        | 26,668          | 43,235     | 0          | 0             | 0             | 0             | 0             | 0             |
| Other meats                                                                     | t CW        | 4,486           | 16,146     | 0          | 0             | 0             | 0             | 0             | 0             |
| Fish and seafood                                                                | t CW        | 166,667         | 267,631    | 1,109,443  | 944,207       | 674,400       | 1,348,800     | 0             | 0             |
| Milk                                                                            | kL          | 3,587,045       | 4,322,111  | 10,043,895 | 6,042,393     | 7,049,459     | 7,049,459     | 8,056,525     | 0             |
| Eggs                                                                            | t           | 199,900         | 256,813    | 429,619    | 402,768       | 335,640       | 335,640       | 738,408       | 0             |
| Cereals (without rice)                                                          | t           | 638,592         | 684,122    | 1,545,648  | 2,838,945     | 1,787,484     | 1,787,484     | 2,733,799     | 3,154,384     |
| Rice                                                                            | t           | 613,288         | 658,457    | 1,484,402  | 2,726,453     | 1,716,656     | 1,716,656     | 2,625,473     | 3,029,392     |
| Baked products                                                                  | t           | 1,431,955       | 1,524,560  | 946,380    | 463,726       | 637,229       | 542,591       | 394,325       | 477,133       |
| Pasta                                                                           | t           | 738,452         | 966,869    | 597,853    | 1,098,097     | 691,394       | 691,394       | 1,057,427     | 1,220,108     |
| Legumes and pulses                                                              | t           | 82,091          | 105,553    | 1,632,038  | 1,632,038     | 1,632,038     | 1,632,038     | 2,448,057     | 2,448,057     |
| Nuts and seeds                                                                  | t           | 14,964          | 23,584     | 178,572    | 714,289       | 714,289       | 952,385       | 714,289       | 1,309,530     |
| Fruits                                                                          | t           | 2,029,776       | 3,084,287  | 12,623,841 | 8,415,894     | 8,415,894     | 8,415,894     | 8,415,894     | 8,415,894     |
| Vegetables                                                                      | t           | 3,743,914       | 4,760,192  | 12,967,670 | 9,077,369     | 6,483,835     | 9,077,369     | 9,077,369     | 9,077,369     |
| Starchy vegetables                                                              | t           | 1,790,737       | 1,923,276  | 1,263,286  | 942,750       | 1,885,501     | 1,319,851     | 942,750       | 1,885,501     |
| Oilcrops                                                                        | t           | 1,016,084       | 1,406,853  | 1,229,892  | 1,844,838     | 1,844,838     | 1,844,838     | 1,844,838     | 2,254,802     |
| <b>Percentage of change in food demand in relation to the baseline scenario</b> |             |                 |            |            |               |               |               |               |               |
| <b>Food items</b>                                                               |             | <b>BAU</b>      | <b>NDG</b> | <b>EL</b>  | <b>EL-ARG</b> | <b>EL-NRM</b> | <b>EL-LOV</b> | <b>EL-VEG</b> |               |
| Beef                                                                            | %           | 27.32%          | -229.66%   | -669.20%   | -34.62%       | 0.00%         | 0.00%         | 0.00%         |               |
| Poultry                                                                         | %           | 12.44%          | -195.32%   | -136.26%   | -148.08%      | -24.04%       | 0.00%         | 0.00%         |               |
| Pork                                                                            | %           | 63.79%          | 50.10%     | -16.44%    | 38.87%        | 69.43%        | 0.00%         | 0.00%         |               |
| Lamb and mutton                                                                 | %           | 38.32%          | 0.00%      | 0.00%      | 0.00%         | 0.00%         | 0.00%         | 0.00%         |               |
| Other meats                                                                     | %           | 72.22%          | 0.00%      | 0.00%      | 0.00%         | 0.00%         | 0.00%         | 0.00%         |               |
| Fish and seafood                                                                | %           | 37.73%          | 84.98%     | 82.35%     | 75.29%        | 87.64%        | 0.00%         | 0.00%         |               |

|                        |   |        |         |          |          |          |          |          |  |
|------------------------|---|--------|---------|----------|----------|----------|----------|----------|--|
| Milk                   | % | 17.01% | 64.29%  | 40.64%   | 49.12%   | 49.12%   | 55.48%   | 0.00%    |  |
| Eggs                   | % | 22.16% | 53.47%  | 50.37%   | 40.44%   | 40.44%   | 72.93%   | 0.00%    |  |
| Cereals (without rice) | % | 6.66%  | 58.68%  | 77.51%   | 64.27%   | 64.27%   | 76.64%   | 79.76%   |  |
| Rice                   | % | 6.86%  | 58.68%  | 77.51%   | 64.27%   | 64.27%   | 76.64%   | 79.76%   |  |
| Baked products         | % | 6.07%  | -51.31% | -208.79% | -124.72% | -163.91% | -263.14% | -200.12% |  |
| Pasta                  | % | 23.62% | -23.52% | 32.75%   | -6.81%   | -6.81%   | 30.17%   | 39.48%   |  |
| Legumes and pulses     | % | 22.23% | 94.97%  | 94.97%   | 94.97%   | 94.97%   | 96.65%   | 96.65%   |  |
| Nuts and seeds         | % | 36.55% | 91.62%  | 97.91%   | 97.91%   | 98.43%   | 97.91%   | 98.86%   |  |
| Fruits                 | % | 34.19% | 83.92%  | 75.88%   | 75.88%   | 75.88%   | 75.88%   | 75.88%   |  |
| Vegetables             | % | 21.35% | 71.13%  | 58.76%   | 42.26%   | 58.76%   | 58.76%   | 58.76%   |  |
| Starchy vegetables     | % | 6.89%  | -41.75% | -89.95%  | 5.03%    | -35.68%  | -89.95%  | 5.03%    |  |
| Oilcrops               | % | 27.78% | 17.38%  | 44.92%   | 44.92%   | 44.92%   | 44.92%   | 54.94%   |  |

**Source:** own elaboration

**TABLE S9.** Environmental footprints of food production for each scenario. Part I

| Food items             | Greenhouse gas emissions<br>(in tons of carbon dioxide equivalent, ton CO <sub>2</sub> -eq) |             |            |            |            |           |           |           | Total land occupation<br>(in hectares, ha) |            |            |           |            |           |           |           |
|------------------------|---------------------------------------------------------------------------------------------|-------------|------------|------------|------------|-----------|-----------|-----------|--------------------------------------------|------------|------------|-----------|------------|-----------|-----------|-----------|
|                        | Baseline                                                                                    | BAU         | NDG        | EL         | EL-ARG     | EL-NRM    | EL-LOV    | EL-VEG    | Baseline                                   | BAU        | NDG        | EL        | EL-ARG     | EL-NRM    | EL-LOV    | EL-VEG    |
| Beef                   | 84,277,917                                                                                  | 115,962,026 | 25,565,280 | 10,956,549 | 62,605,719 | 0         | 0         | 0         | 53,213,219                                 | 73,218,619 | 16,141,961 | 6,917,983 | 39,529,357 | 0         | 0         | 0         |
| Poultry                | 1,417,044                                                                                   | 1,618,440   | 479,835    | 599,793    | 571,203    | 1,142,406 | 0         | 0         | 979,549                                    | 1,118,767  | 331,692    | 414,614   | 394,851    | 789,702   | 0         | 0         |
| Pork                   | 925,984                                                                                     | 2,557,251   | 1,855,604  | 795,259    | 1,514,703  | 3,029,406 | 0         | 0         | 402,126                                    | 1,110,536  | 805,832    | 345,356   | 657,789    | 1,315,578 | 0         | 0         |
| Lamb and mutton        | 954,661                                                                                     | 1,547,721   | 0          | 0          | 0          | 0         | 0         | 0         | 340,815                                    | 552,538    | 0          | 0         | 0          | 0         | 0         | 0         |
| Other meats            | 160,594                                                                                     | 578,011     | 0          | 0          | 0          | 0         | 0         | 0         | 57,332                                     | 206,351    | 0          | 0         | 0          | 0         | 0         | 0         |
| Fish and seafood       | 305,001                                                                                     | 489,764     | 2,030,281  | 1,727,899  | 1,234,152  | 2,468,304 | 0         | 0         | 167                                        | 268        | 1,109      | 944       | 674        | 1,349     | 0         | 0         |
| Milk                   | 3,919,041                                                                                   | 4,722,141   | 10,973,501 | 6,601,643  | 7,701,917  | 7,701,917 | 8,802,191 | 0         | 1,649,363                                  | 1,987,355  | 4,618,295  | 2,778,360 | 3,241,420  | 3,241,420 | 3,704,480 | 0         |
| Eggs                   | 137,813                                                                                     | 177,049     | 296,182    | 277,671    | 231,393    | 231,393   | 509,064   | 0         | 123,938                                    | 159,224    | 266,364    | 249,716   | 208,097    | 208,097   | 457,813   | 0         |
| Cereals (without rice) | 523,646                                                                                     | 560,980     | 1,267,431  | 2,327,935  | 1,465,737  | 1,465,737 | 2,241,715 | 2,586,595 | 293,752                                    | 314,696    | 710,998    | 1,305,915 | 822,243    | 822,243   | 1,257,548 | 1,451,016 |
| Rice                   | 1,030,324                                                                                   | 1,106,207   | 2,493,796  | 4,580,441  | 2,883,982  | 2,883,982 | 4,410,795 | 5,089,379 | 110,392                                    | 118,522    | 267,192    | 490,762   | 308,998    | 308,998   | 472,585   | 545,291   |
| Baked products         | 1,019,552                                                                                   | 1,085,487   | 673,823    | 330,173    | 453,707    | 386,325   | 280,759   | 339,719   | 780,416                                    | 830,885    | 515,777    | 252,731   | 347,290    | 295,712   | 214,907   | 260,038   |
| Pasta                  | 525,778                                                                                     | 688,411     | 425,671    | 781,845    | 492,273    | 492,273   | 752,888   | 868,717   | 402,456                                    | 526,944    | 325,830    | 598,463   | 376,810    | 376,810   | 576,298   | 664,959   |
| Legumes and pulses     | 18,060                                                                                      | 23,222      | 359,048    | 359,048    | 359,048    | 359,048   | 538,573   | 538,573   | 35,299                                     | 45,388     | 701,776    | 701,776   | 701,776    | 701,776   | 1,052,665 | 1,052,665 |
| Nuts and seeds         | 30,064                                                                                      | 47,381      | 358,752    | 1,435,006  | 1,435,006  | 1,913,342 | 1,435,006 | 2,630,845 | 494                                        | 778        | 5,893      | 23,572    | 23,572     | 31,429    | 23,572    | 43,214    |
| Fruits                 | 365,360                                                                                     | 555,172     | 2,272,291  | 1,514,861  | 1,514,861  | 1,514,861 | 1,514,861 | 1,514,861 | 81,191                                     | 123,371    | 504,954    | 336,636   | 336,636    | 336,636   | 336,636   | 336,636   |
| Vegetables             | 1,272,931                                                                                   | 1,618,465   | 4,409,008  | 3,086,306  | 2,204,504  | 3,086,306 | 3,086,306 | 3,086,306 | 179,708                                    | 228,489    | 622,448    | 435,714   | 311,224    | 435,714   | 435,714   | 435,714   |
| Starchy vegetables     | 232,796                                                                                     | 250,026     | 164,227    | 122,558    | 245,115    | 171,581   | 122,558   | 245,115   | 59,094                                     | 63,468     | 41,688     | 31,111    | 62,222     | 43,555    | 31,111    | 62,222    |
| Oilcrops               | 1,747,                                                                                      | 2,419,      | 2,115,     | 3,173,     | 3,173,     | 3,173,    | 3,173,    | 3,878,    | 1,087,                                     | 1,505,     | 1,315,     | 1,973,    | 1,973,     | 1,973,    | 1,973,    | 2,412,    |



|              |               |               |               |               |               |               |               |               |               |               |               |               |               |               |               |               |
|--------------|---------------|---------------|---------------|---------------|---------------|---------------|---------------|---------------|---------------|---------------|---------------|---------------|---------------|---------------|---------------|---------------|
|              | 665           | 788           | 414           | 121           | 121           | 121           | 121           | 259           | 210           | 333           | 984           | 976           | 976           | 976           | 976           | 638           |
| <b>TOTAL</b> | <b>98,864</b> | <b>136,00</b> | <b>55,740</b> | <b>38,670</b> | <b>88,086</b> | <b>30,019</b> | <b>26,867</b> | <b>20,778</b> | <b>59,796</b> | <b>82,111</b> | <b>27,177</b> | <b>16,857</b> | <b>49,296</b> | <b>10,882</b> | <b>10,537</b> | <b>7,264,</b> |
|              | <b>,229</b>   | <b>7,541</b>  | <b>,144</b>   | <b>,108</b>   | <b>,441</b>   | <b>,999</b>   | <b>,836</b>   | <b>,367</b>   | <b>,523</b>   | <b>,532</b>   | <b>,794</b>   | <b>,629</b>   | <b>,935</b>   | <b>,995</b>   | <b>,303</b>   | <b>391</b>    |

Source: own elaboration

**TABLE S9.** Environmental footprints of food production for each scenario. Part II

| Food items             | Cropland use<br>(in hectares, ha) |                   |                  |                  |                   |                  |                  |                  | Fossil energy use<br>(in terajoules, TJ) |                |                |                |                |                |                |
|------------------------|-----------------------------------|-------------------|------------------|------------------|-------------------|------------------|------------------|------------------|------------------------------------------|----------------|----------------|----------------|----------------|----------------|----------------|
|                        | Baselin<br>e                      | BAU               | NDG              | EL               | EL-<br>ARG        | EL-<br>NRM       | EL-<br>LOV       | EL-<br>VEG       | Baselin<br>eBAU                          | NDG            | EL             | EL-<br>ARG     | EL-<br>NRM     | EL-<br>LOV     | EL-<br>VEG     |
| Beef                   | 2,828,569                         | 3,891,964         | 858,032          | 367,728          | 2,101,198         | 0                | 0                | 0                | 22,67131,194                             | 6,877          | 2,947          | 16,841         | 0              | 0              | 0              |
| Poultry                | 979,549                           | 1,118,767         | 331,692          | 414,614          | 394,851           | 789,702          | 0                | 0                | 16,10418,393                             | 5,453          | 6,816          | 6,492          | 12,983         | 0              | 0              |
| Pork                   | 402,126                           | 1,110,536         | 805,832          | 345,356          | 657,789           | 1,315,578        | 0                | 0                | 6,63918,335                              | 13,304         | 5,702          | 10,860         | 21,720         | 0              | 0              |
| Lamb and mutton        | 0                                 | 0                 | 0                | 0                | 0                 | 0                | 0                | 0                | 604979                                   | 0              | 0              | 0              | 0              | 0              | 0              |
| Other meats            | 0                                 | 0                 | 0                | 0                | 0                 | 0                | 0                | 0                | 102366                                   | 0              | 0              | 0              | 0              | 0              | 0              |
| Fish and seafood       | 89                                | 143               | 593              | 504              | 360               | 720              | 0                | 0                | 4,5877,365                               | 30,532         | 25,985         | 18,559         | 37,119         | 0              | 0              |
| Milk                   | 880,905                           | 1,061,422         | 2,466,576        | 1,483,889        | 1,731,204         | 1,731,204        | 1,978,518        | 0                | 8,74610,538                              | 24,489         | 14,733         | 17,188         | 17,188         | 19,643         | 0              |
| Eggs                   | 123,938                           | 159,224           | 266,364          | 249,716          | 208,097           | 208,097          | 457,813          | 0                | 1,2561,613                               | 2,699          | 2,530          | 2,109          | 2,109          | 4,639          | 0              |
| Cereals (without rice) | 293,752                           | 314,696           | 710,998          | 1,305,915        | 822,243           | 822,243          | 1,257,548        | 1,451,016        | 2,2412,401                               | 5,425          | 9,965          | 6,274          | 6,274          | 9,596          | 11,072         |
| Rice                   | 110,392                           | 118,522           | 267,192          | 490,762          | 308,998           | 308,998          | 472,585          | 545,291          | 4,8145,169                               | 11,653         | 21,403         | 13,476         | 13,476         | 20,610         | 23,781         |
| Baked products         | 780,416                           | 830,885           | 515,777          | 252,731          | 347,290           | 295,712          | 214,907          | 260,038          | 3,1563,360                               | 2,086          | 1,022          | 1,404          | 1,196          | 869            | 1,052          |
| Pasta                  | 402,456                           | 526,944           | 325,830          | 598,463          | 376,810           | 376,810          | 576,298          | 664,959          | 1,6282,131                               | 1,318          | 2,420          | 1,524          | 1,524          | 2,331          | 2,689          |
| Legumes and pulses     | 35,299                            | 45,388            | 701,776          | 701,776          | 701,776           | 701,776          | 1,052,665        | 1,052,665        | 190244                                   | 3,770          | 3,770          | 3,770          | 3,770          | 5,655          | 5,655          |
| Nuts and seeds         | 494                               | 778               | 5,893            | 23,572           | 23,572            | 31,429           | 23,572           | 43,214           | 409645                                   | 4,880          | 19,522         | 19,522         | 26,029         | 19,522         | 35,789         |
| Fruits                 | 81,191                            | 123,371           | 504,954          | 336,636          | 336,636           | 336,636          | 336,636          | 336,636          | 2,8014,256                               | 17,421         | 11,614         | 11,614         | 11,614         | 11,614         | 11,614         |
| Vegetables             | 179,708                           | 228,489           | 622,448          | 435,714          | 311,224           | 435,714          | 435,714          | 435,714          | 9,4351,996                               | 32,679         | 22,875         | 16,339         | 22,875         | 22,875         | 22,875         |
| Starchy vegetables     | 59,094                            | 63,468            | 41,688           | 31,111           | 62,222            | 43,555           | 31,111           | 62,222           | 2,2742,443                               | 1,604          | 1,197          | 2,395          | 1,676          | 1,197          | 2,395          |
| Oilcrops               | 1,087,210                         | 1,505,333         | 1,315,984        | 1,973,976        | 1,973,976         | 1,973,976        | 1,973,976        | 2,412,638        | 18,06625,014                             | 21,867         | 32,801         | 32,801         | 32,801         | 32,801         | 40,090         |
| <b>TOTAL</b>           | <b>8,245,189</b>                  | <b>11,099,931</b> | <b>9,741,629</b> | <b>9,012,463</b> | <b>10,358,245</b> | <b>9,372,150</b> | <b>8,811,341</b> | <b>7,264,391</b> | <b>105,722146,4</b>                      | <b>186,057</b> | <b>185,302</b> | <b>181,167</b> | <b>212,353</b> | <b>151,352</b> | <b>157,012</b> |

|  |  |  |  |  |  |  |  |  |    |  |  |  |  |  |  |
|--|--|--|--|--|--|--|--|--|----|--|--|--|--|--|--|
|  |  |  |  |  |  |  |  |  | 42 |  |  |  |  |  |  |
|--|--|--|--|--|--|--|--|--|----|--|--|--|--|--|--|

Source: own elaboration

**TABLE S9.** Environmental footprints of food production for each scenario. Part III

| Food items             | Freshwater consumption<br>(in cubic hectometers, hm <sup>3</sup> ) |               |               |               |               |               |               |               | Eutrophying emissions<br>(in tons of phosphate equivalents, ton PO <sub>4</sub> -eqhm <sup>3</sup> ) |               |               |               |               |               |               |               |
|------------------------|--------------------------------------------------------------------|---------------|---------------|---------------|---------------|---------------|---------------|---------------|------------------------------------------------------------------------------------------------------|---------------|---------------|---------------|---------------|---------------|---------------|---------------|
|                        | Baseline                                                           | BAU           | NDG           | EL            | EL-ARG        | EL-NRM        | EL-LOV        | EL-VEG        | Baseline                                                                                             | BAU           | NDG           | EL            | EL-ARG        | EL-NRM        | EL-LOV        | EL-VEG        |
| Beef                   | 2,765                                                              | 3,805         | 839           | 360           | 2,054         | 0             | 0             | 0             | 88,798                                                                                               | 122,182       | 26,937        | 11,544        | 65,964        | 0             | 0             | 0             |
| Poultry                | 1,082                                                              | 1,236         | 366           | 458           | 436           | 872           | 0             | 0             | 23,560                                                                                               | 26,909        | 7,978         | 9,972         | 9,497         | 18,994        | 0             | 0             |
| Pork                   | 992                                                                | 2,739         | 1,988         | 852           | 1,622         | 3,245         | 0             | 0             | 6,785                                                                                                | 18,738        | 13,597        | 5,827         | 11,099        | 22,197        | 0             | 0             |
| Lamb and mutton        | 51                                                                 | 82            | 0             | 0             | 0             | 0             | 0             | 0             | 9,410                                                                                                | 15,256        | 0             | 0             | 0             | 0             | 0             | 0             |
| Other meats            | 9                                                                  | 31            | 0             | 0             | 0             | 0             | 0             | 0             | 1,583                                                                                                | 5,698         | 0             | 0             | 0             | 0             | 0             | 0             |
| Fish and seafood       | 0                                                                  | 0             | 0             | 0             | 0             | 0             | 0             | 0             | 408                                                                                                  | 656           | 2,718         | 2,313         | 1,652         | 3,305         | 0             | 0             |
| Milk                   | 897                                                                | 1,081         | 2,511         | 1,511         | 1,762         | 1,762         | 2,014         | 0             | 42,879                                                                                               | 51,666        | 120,064       | 72,230        | 84,269        | 84,269        | 96,307        | 0             |
| Eggs                   | 114                                                                | 146           | 245           | 230           | 191           | 191           | 421           | 0             | 2,349                                                                                                | 3,018         | 5,048         | 4,733         | 3,944         | 3,944         | 8,677         | 0             |
| Cereals (without rice) | 2,778                                                              | 2,976         | 6,724         | 12,349        | 7,776         | 7,776         | 11,892        | 13,722        | 2,491                                                                                                | 2,668         | 6,028         | 11,072        | 6,971         | 6,971         | 10,662        | 12,302        |
| Rice                   | 2,748                                                              | 2,950         | 6,650         | 12,215        | 7,691         | 7,691         | 11,762        | 13,572        | 6,133                                                                                                | 6,585         | 14,844        | 27,265        | 17,167        | 17,167        | 26,255        | 30,294        |
| Baked products         | 158                                                                | 168           | 104           | 51            | 70            | 60            | 43            | 52            | 6,611                                                                                                | 7,039         | 4,369         | 2,141         | 2,942         | 2,505         | 1,821         | 2,203         |
| Pasta                  | 81                                                                 | 106           | 66            | 121           | 76            | 76            | 116           | 134           | 3,409                                                                                                | 4,464         | 2,760         | 5,070         | 3,192         | 3,192         | 4,882         | 5,633         |
| Legumes and pulses     | 27                                                                 | 35            | 539           | 539           | 539           | 539           | 808           | 808           | 205                                                                                                  | 264           | 4,080         | 4,080         | 4,080         | 4,080         | 6,120         | 6,120         |
| Nuts and seeds         | 127                                                                | 201           | 1,521         | 6,086         | 6,086         | 8,114         | 6,086         | 11,157        | 54                                                                                                   | 85            | 646           | 2,586         | 2,586         | 3,448         | 2,586         | 4,740         |
| Fruits                 | 4,851                                                              | 7,371         | 30,171        | 20,114        | 20,114        | 20,114        | 20,114        | 20,114        | 20,298                                                                                               | 30,843        | 126,238       | 84,159        | 84,159        | 84,159        | 84,159        | 84,159        |
| Vegetables             | 5,241                                                              | 6,664         | 18,155        | 12,708        | 9,077         | 12,708        | 12,708        | 12,708        | 2,284                                                                                                | 2,904         | 7,910         | 5,537         | 3,955         | 5,537         | 5,537         | 5,537         |
| Starchy vegetables     | 913                                                                | 981           | 644           | 481           | 962           | 673           | 481           | 962           | 2,149                                                                                                | 2,308         | 1,516         | 1,131         | 2,263         | 1,584         | 1,131         | 2,263         |
| Oilcrops               | 112                                                                | 155           | 135           | 203           | 203           | 203           | 203           | 248           | 18,655                                                                                               | 25,830        | 22,581        | 33,871        | 33,871        | 33,871        | 33,871        | 41,398        |
| <b>TOTAL</b>           | <b>22,945</b>                                                      | <b>30,726</b> | <b>70,657</b> | <b>68,276</b> | <b>58,659</b> | <b>64,024</b> | <b>66,649</b> | <b>73,477</b> | <b>238,06</b>                                                                                        | <b>327,11</b> | <b>367,31</b> | <b>283,53</b> | <b>337,61</b> | <b>295,22</b> | <b>282,00</b> | <b>194,65</b> |

|  |  |  |  |  |  |  |  |  |   |   |   |   |   |   |   |   |
|--|--|--|--|--|--|--|--|--|---|---|---|---|---|---|---|---|
|  |  |  |  |  |  |  |  |  | 3 | 1 | 5 | 2 | 0 | 3 | 8 | 0 |
|--|--|--|--|--|--|--|--|--|---|---|---|---|---|---|---|---|

Source: own elaboration



|                     |      |             |             |             |             |             |             |             |             |
|---------------------|------|-------------|-------------|-------------|-------------|-------------|-------------|-------------|-------------|
| drinks              |      |             |             |             |             |             |             |             |             |
| SSBs                | 0.10 | 0.18        | 0.25        | 0.00        | 0.00        | 0.00        | 0.00        | 0.00        | 0.00        |
| Alcoholic beverages | 0.27 | 0.11        | 0.19        | 0.00        | 0.00        | 0.00        | 0.00        | 0.00        | 0.00        |
| <b>TOTAL</b>        |      | <b>2.78</b> | <b>3.83</b> | <b>3.53</b> | <b>3.08</b> | <b>3.21</b> | <b>3.34</b> | <b>2.85</b> | <b>2.62</b> |

Source: own elaboration
